# Supplementary material for: YB-1 Mediates TNF-Induced Pro-Survival Signaling by Regulating NF-κB Activation
Source: MDPI journal article supplement (doi:10.3390/cancers12082188), 2020-08-05
Supplement: s1 [file s1]

Single Lane Report with Profile Project Vinculin-pp65-TNFR1

Project Data:

|                  |                     |
|------------------|---------------------|
| Name:            | Vinculin-pp65-TNFR1 |
| Project Status:  | private             |
| User:            | anshah              |
| Date:            | 26.05.2020, 13:35   |
| Created at:      | 26.05.2020, 13:35   |
| Type of Project: | Protein Gel         |
| Comment:         | No Arguments        |

Gel Image:

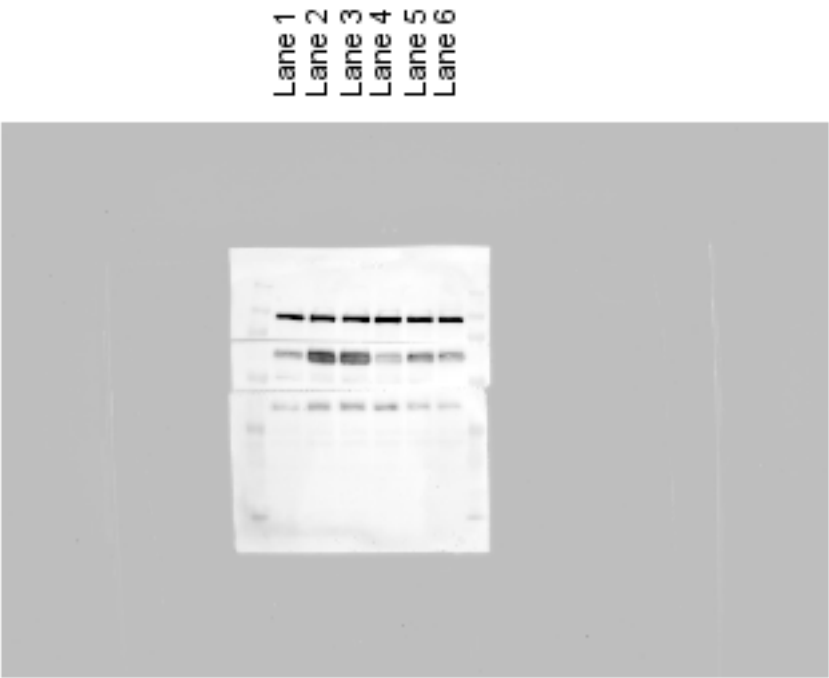

Lane 1: Lane 1

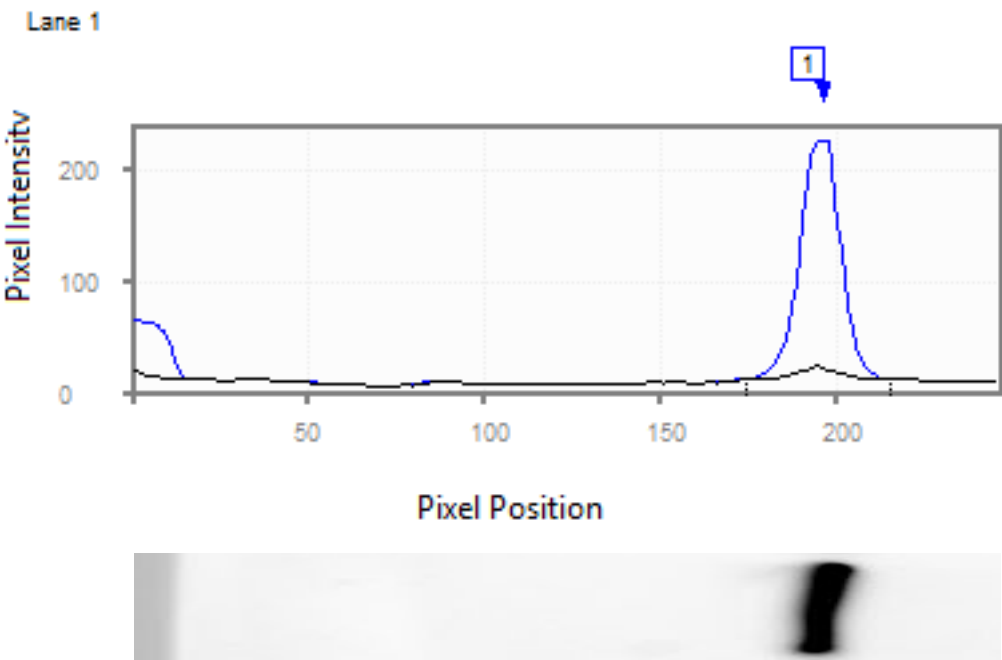

Method: Rolling Ball, Parameter: 20

| Band Nr. | Band N. | Band Vol.   | Backgr. Vol. | RF    | MW |
|----------|---------|-------------|--------------|-------|----|
| Band 1   | 1       | 227,977.000 | 54,858.000   | 0.796 | -- |

| Band Nr. | Cal. Band Vol. |
|----------|----------------|
| Band 1   | 0.000          |

Lane 2: Lane 2

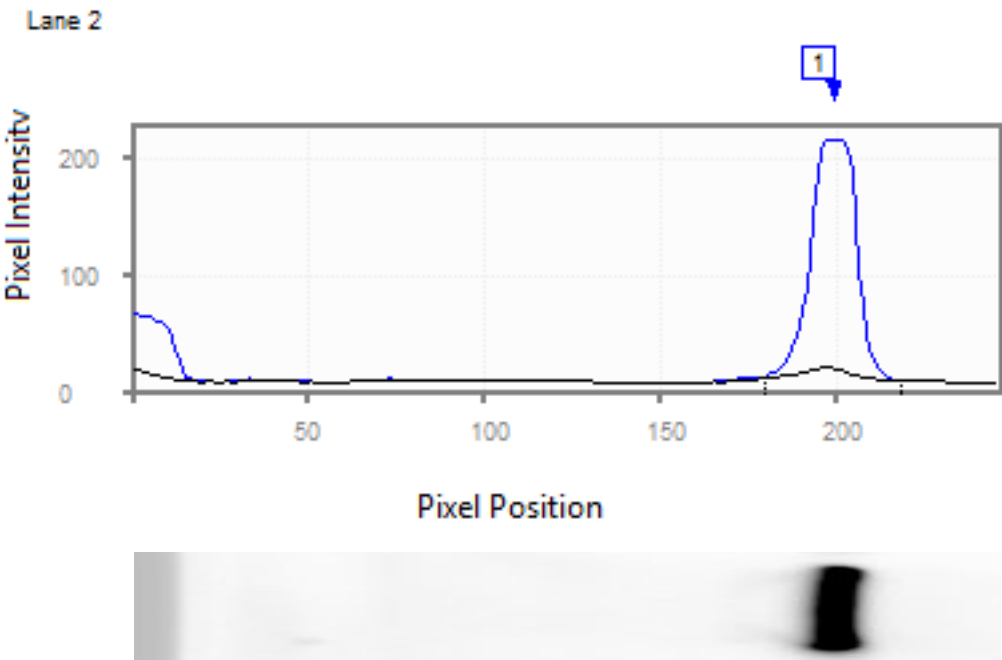

Method: Rolling Ball, Parameter: 20

| Band Nr. | Band N. | Band Vol.   | Backgr. Vol. | RF    | MW |
|----------|---------|-------------|--------------|-------|----|
| Band 1   | 1       | 244,235.000 | 48,680.000   | 0.808 | -- |

| Band Nr. | Cal. Band Vol. |
|----------|----------------|
| Band 1   | 0.000          |

Lane 3: Lane 3

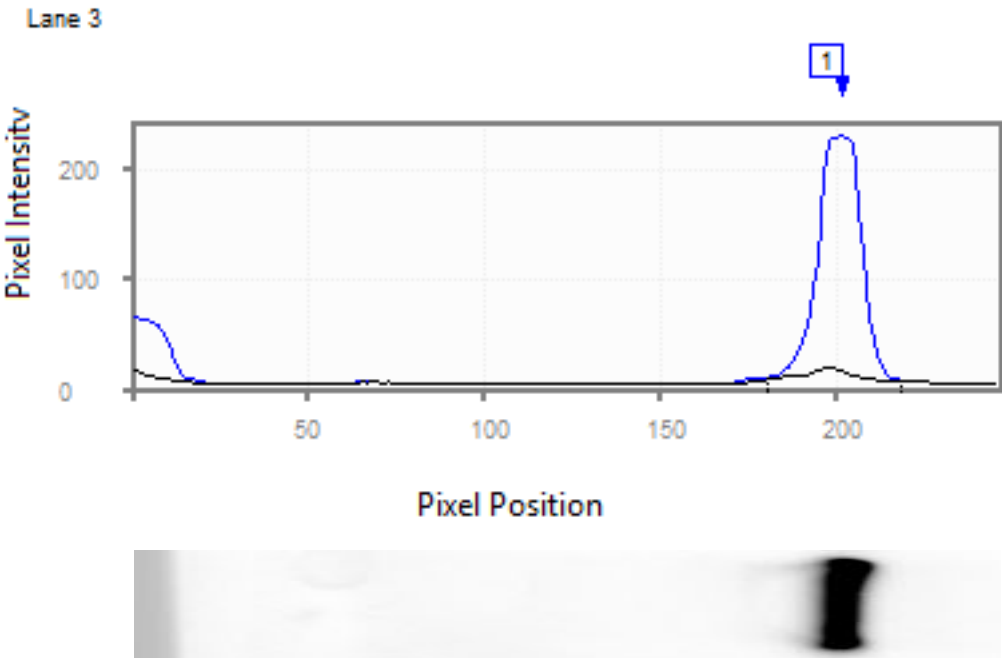

Method: Rolling Ball, Parameter: 20

| Band Nr. | Band N. | Band Vol.   | Backgr. Vol. | RF    | MW |
|----------|---------|-------------|--------------|-------|----|
| Band 1   | 1       | 252,808.000 | 41,717.000   | 0.816 | -- |

| Band Nr. | Cal. Band Vol. |
|----------|----------------|
| Band 1   | 0.000          |

Lane 4: Lane 4

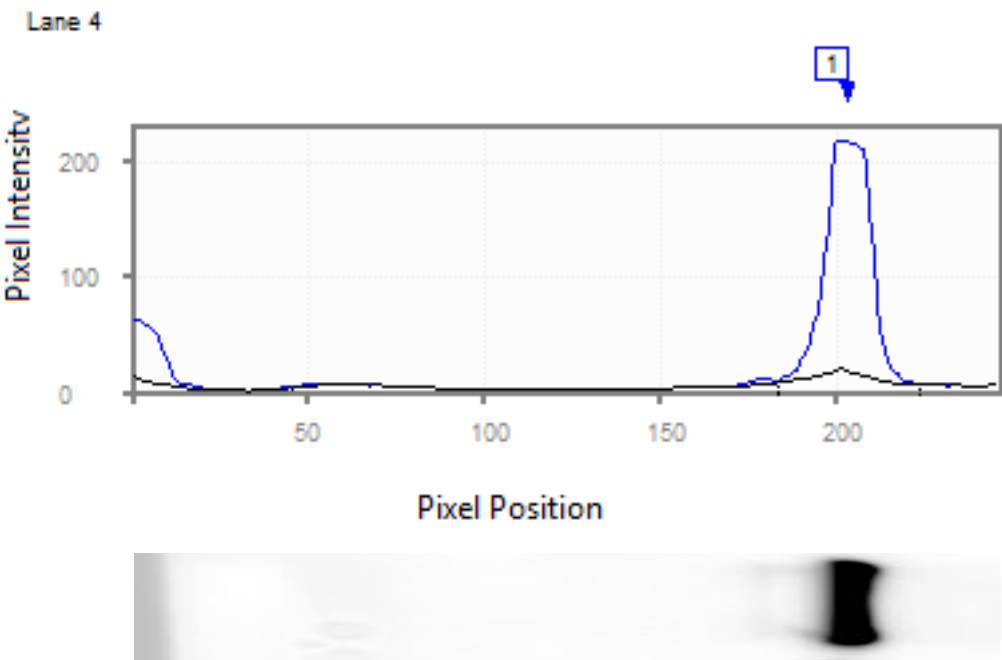

Method: Rolling Ball, Parameter: 20

| Band Nr. | Band N. | Band Vol.   | Backgr. Vol. | RF    | MW |
|----------|---------|-------------|--------------|-------|----|
| Band 1   | 1       | 252,742.000 | 44,969.000   | 0.824 | -- |

| Band Nr. | Cal. Band Vol. |
|----------|----------------|
| Band 1   | 0.000          |

Lane 5: Lane 5

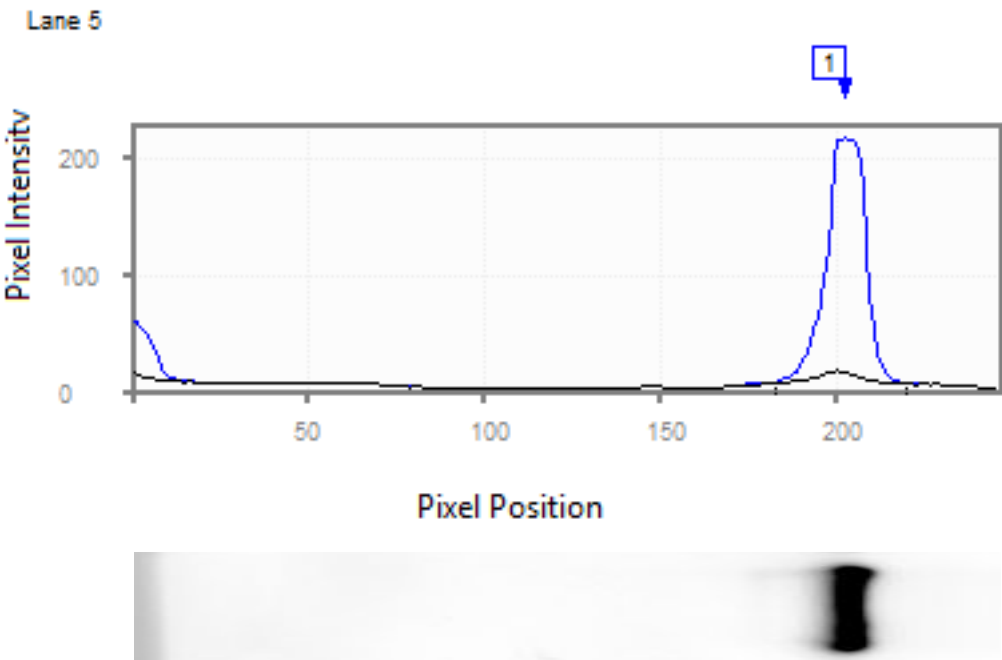

Method: Rolling Ball, Parameter: 20

| Band Nr. | Band N. | Band Vol.   | Backgr. Vol. | RF    | MW |
|----------|---------|-------------|--------------|-------|----|
| Band 1   | 1       | 216,936.000 | 36,526.000   | 0.820 | -- |

| Band Nr. | Cal. Band Vol. |
|----------|----------------|
| Band 1   | 0.000          |

Lane 6: Lane 6

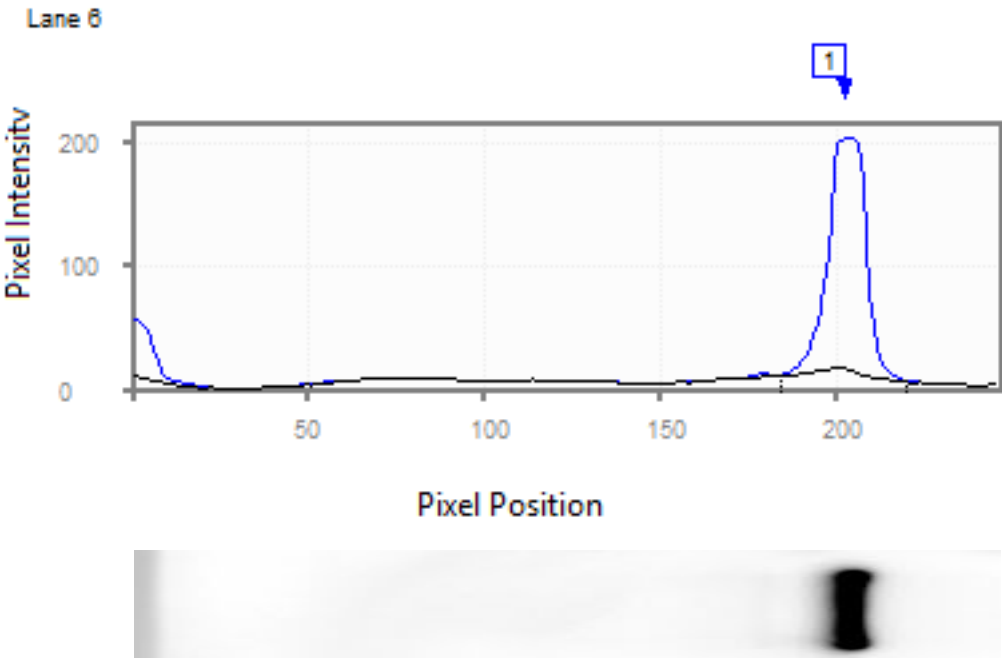

Method: Rolling Ball, Parameter: 20

| Band Nr. | Band N. | Band Vol.   | Backgr. Vol. | RF    | MW |
|----------|---------|-------------|--------------|-------|----|
| Band 1   | 1       | 197,306.000 | 37,298.000   | 0.820 | -- |

| Band Nr. | Cal. Band Vol. |
|----------|----------------|
| Band 1   | 0.000          |
