# Supplementary material for: YB-1 Mediates TNF-Induced Pro-Survival Signaling by Regulating NF-κB Activation
Source: MDPI journal article supplement (doi:10.3390/cancers12082188), 2020-08-05
Supplement: s1 [file s1]

Single Lane Report with Profile Project p-Ikbb-a

|                  |                   |
|------------------|-------------------|
| Project Data:    |                   |
| Name:            | p-Ikbb-a          |
| Project Status:  | private           |
| User:            | anshah            |
| Date:            | 26.05.2020, 13:27 |
| Created at:      | 26.05.2020, 13:27 |
| Type of Project: | Protein Gel       |
| Comment:         | No Arguments      |

Gel Image:

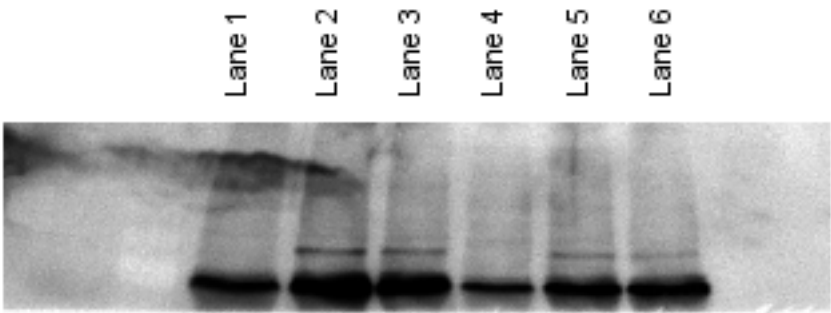

Lane 1: Lane 1

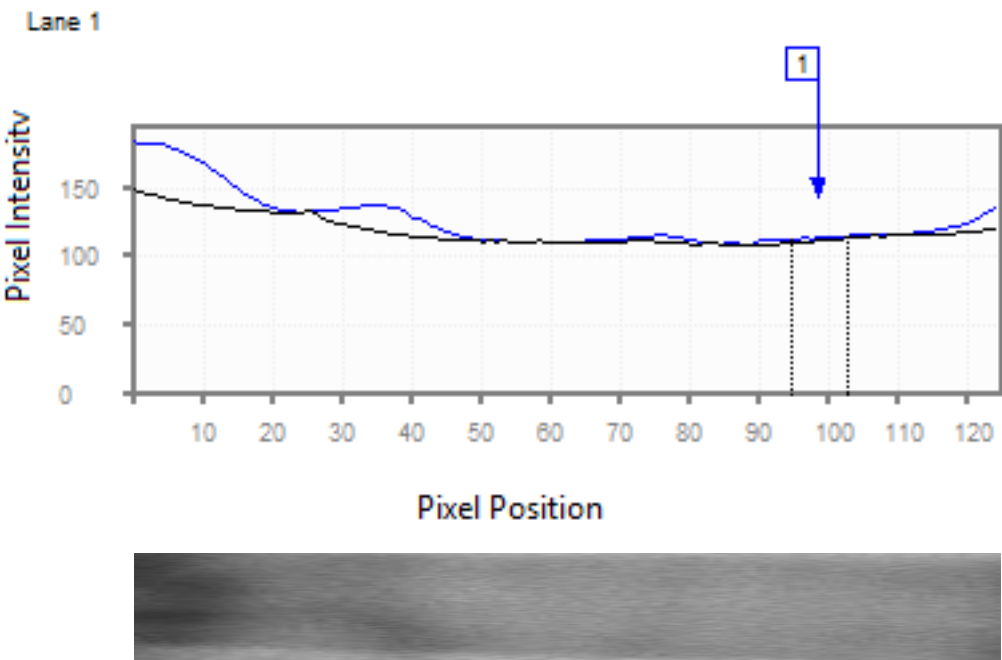

Method: Rolling Ball, Parameter: 20

| Band Nr. | Band N. | Band Vol. | Backgr. Vol. | RF    | MW |
|----------|---------|-----------|--------------|-------|----|
| Band 1   | 1       | 1,954.000 | 100,865.000  | 0.790 | -- |

| Band Nr. | Cal. Band Vol. |
|----------|----------------|
| Band 1   | 0.000          |

Lane 2: Lane 2

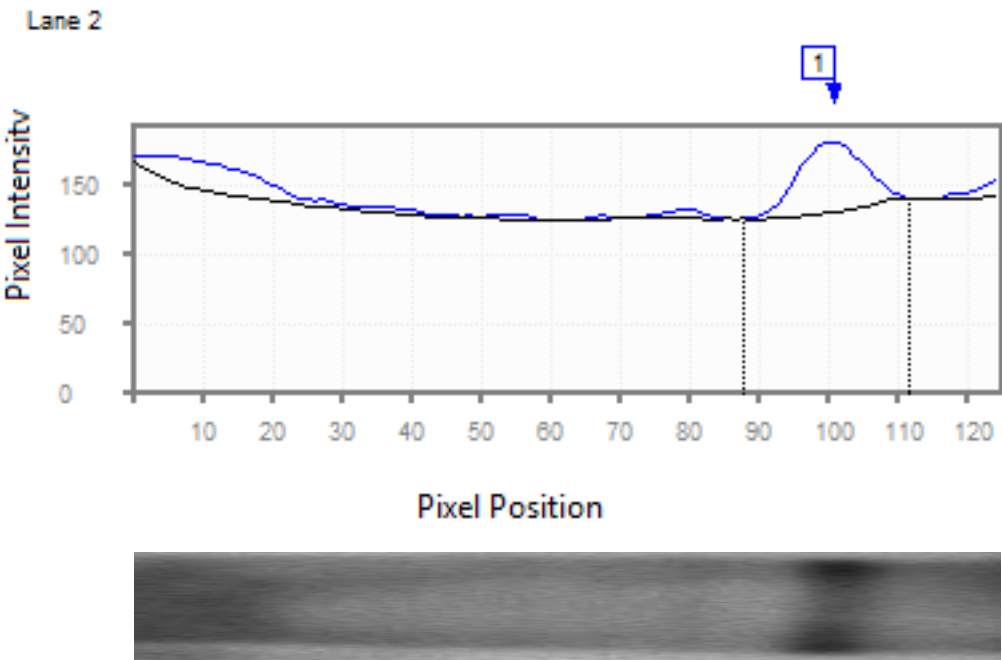

Method: Rolling Ball, Parameter: 20

| Band Nr. | Band N. | Band Vol.  | Backgr. Vol. | RF    | MW |
|----------|---------|------------|--------------|-------|----|
| Band 1   | 1       | 64,117.000 | 358,107.000  | 0.806 | -- |

| Band Nr. | Cal. Band Vol. |
|----------|----------------|
| Band 1   | 0.000          |

Lane 3: Lane 3

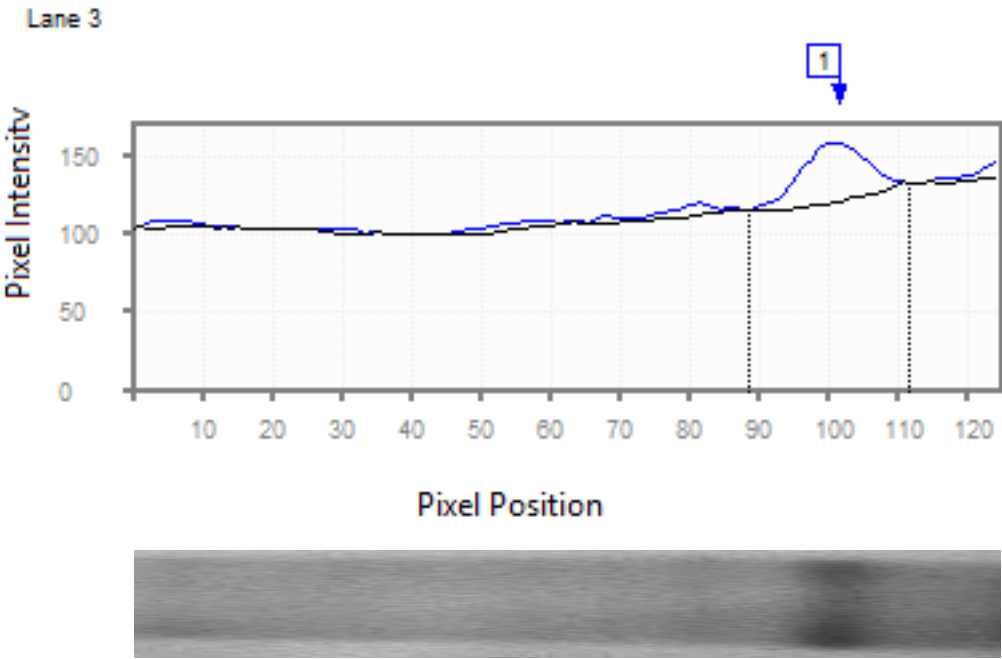

Method: Rolling Ball, Parameter: 20

| Band Nr. | Band N. | Band Vol.  | Backgr. Vol. | RF    | MW |
|----------|---------|------------|--------------|-------|----|
| Band 1   | 1       | 48,632.000 | 317,083.000  | 0.815 | -- |

| Band Nr. | Cal. Band Vol. |
|----------|----------------|
| Band 1   | 0.000          |

Lane 4: Lane 4

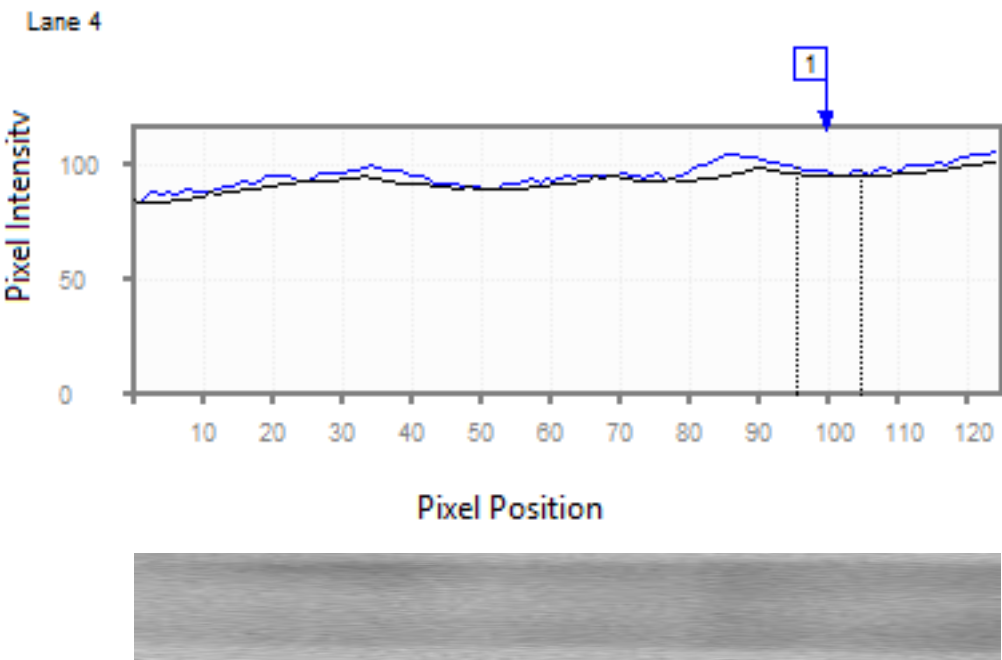

Method: Rolling Ball, Parameter: 20

| Band Nr. | Band N. | Band Vol. | Backgr. Vol. | RF    | MW |
|----------|---------|-----------|--------------|-------|----|
| Band 1   | 1       | 1,273.000 | 97,529.000   | 0.798 | -- |

| Band Nr. | Cal. Band Vol. |
|----------|----------------|
| Band 1   | 0.000          |

Lane 5: Lane 5

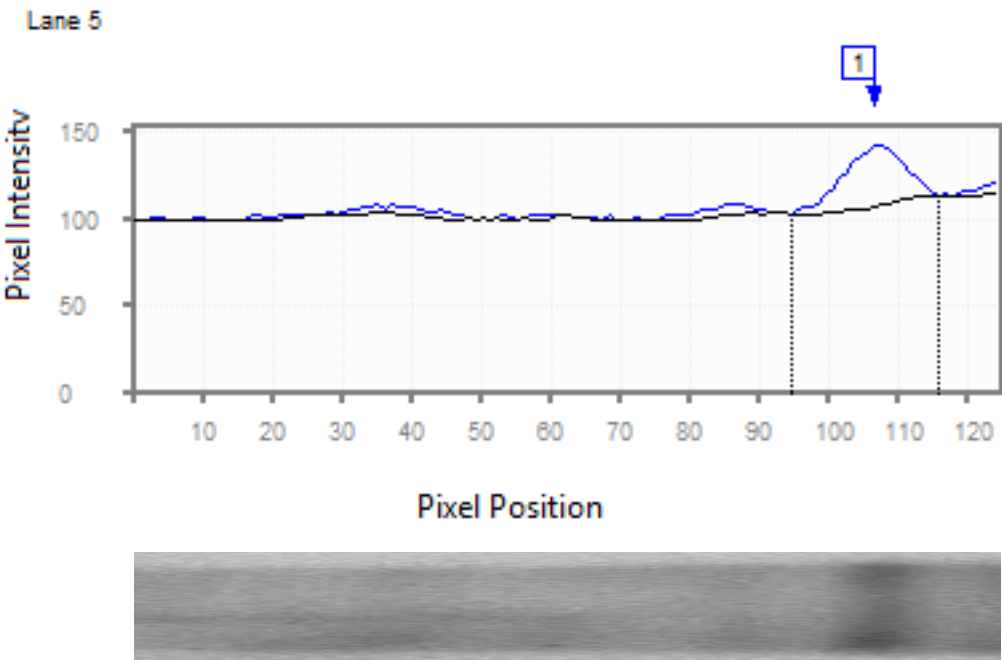

Method: Rolling Ball, Parameter: 20

| Band Nr. | Band N. | Band Vol.  | Backgr. Vol. | RF    | MW |
|----------|---------|------------|--------------|-------|----|
| Band 1   | 1       | 39,436.000 | 256,262.000  | 0.855 | -- |

| Band Nr. | Cal. Band Vol. |
|----------|----------------|
| Band 1   | 0.000          |

Lane 6: Lane 6

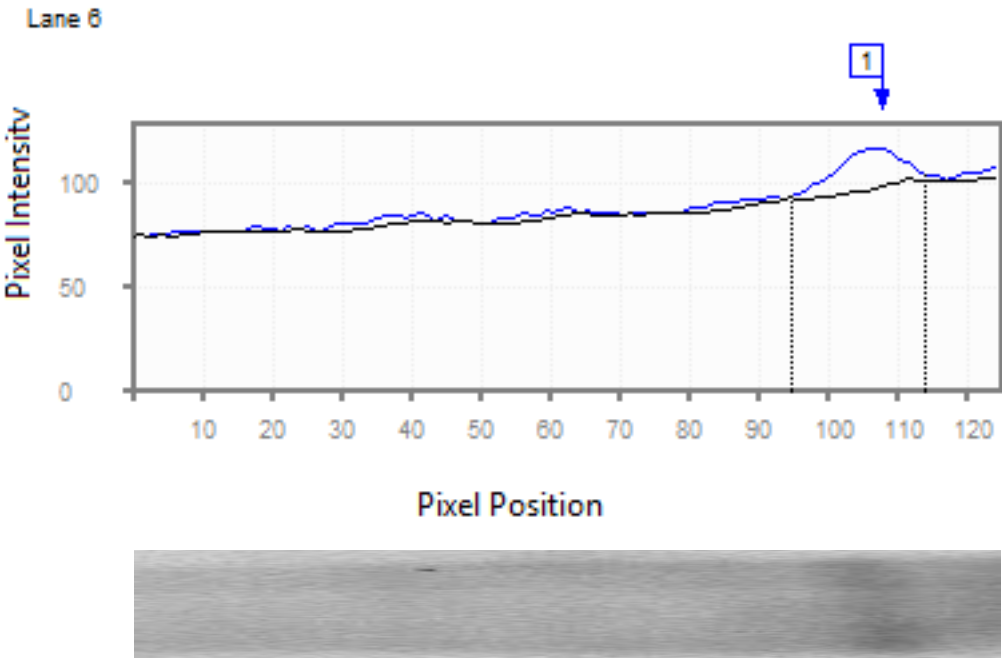

Method: Rolling Ball, Parameter: 20

| Band Nr. | Band N. | Band Vol.  | Backgr. Vol. | RF    | MW |
|----------|---------|------------|--------------|-------|----|
| Band 1   | 1       | 24,893.000 | 208,942.000  | 0.863 | -- |

| Band Nr. | Cal. Band Vol. |
|----------|----------------|
| Band 1   | 0.000          |
