# Supplementary material for: YB-1 Mediates TNF-Induced Pro-Survival Signaling by Regulating NF-κB Activation
Source: MDPI journal article supplement (doi:10.3390/cancers12082188), 2020-08-05
Supplement: s1 [file s1]

Single Lane Report with Profile Project total Ikba

|                  |                   |
|------------------|-------------------|
| Project Data:    |                   |
| Name:            | total Ikba        |
| Project Status:  | private           |
| User:            | anshah            |
| Date:            | 28.05.2020, 09:51 |
| Created at:      | 28.05.2020, 09:51 |
| Type of Project: | Protein Gel       |
| Comment:         | No Arguments      |

Gel Image:

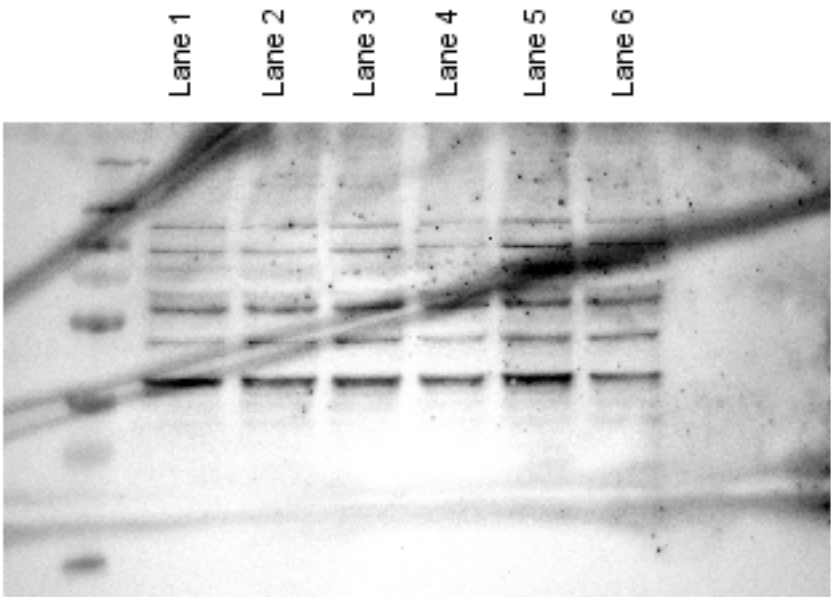

Lane 1: Lane 1

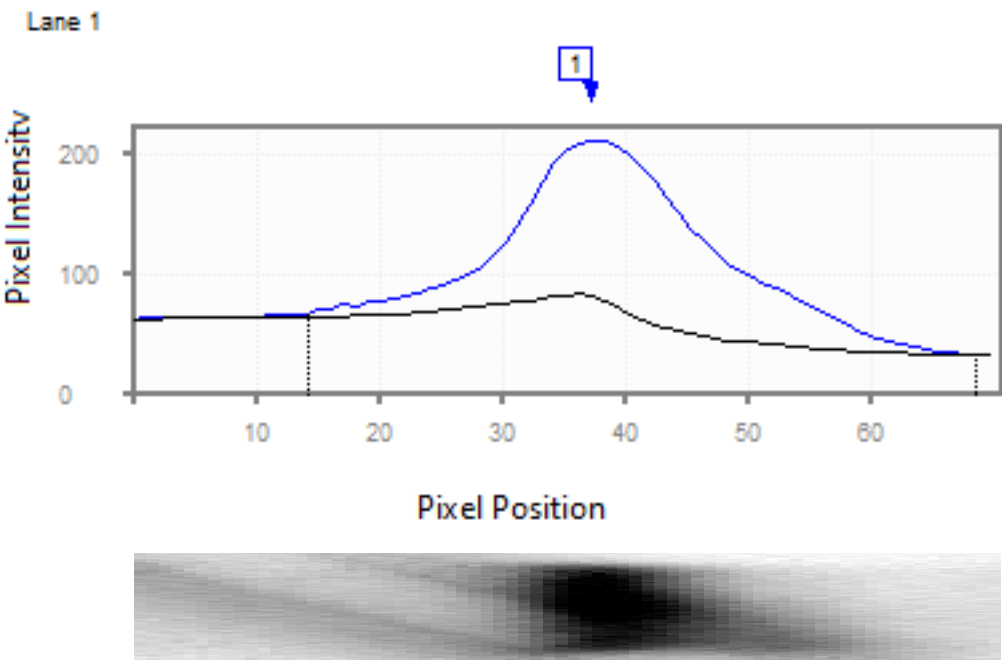

| Band Nr. | Band N. | Band Vol.   | Backgr. Vol. | RF    | MW |
|----------|---------|-------------|--------------|-------|----|
| Band 1   | 1       | 344,917.000 | 396,972.000  | 0.529 | -- |

| Band Nr. | Cal. Band Vol. |
|----------|----------------|
| Band 1   | 0.000          |

Lane 2: Lane 2

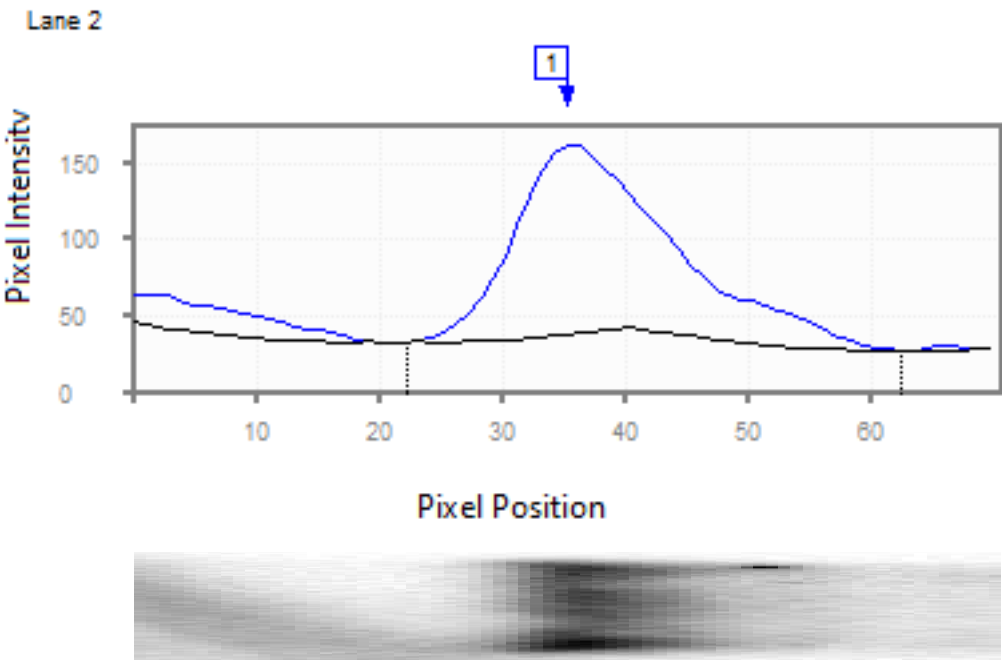

| Band Nr. | Band N. | Band Vol.   | Backgr. Vol. | RF    | MW |
|----------|---------|-------------|--------------|-------|----|
| Band 1   | 1       | 217,087.000 | 162,950.000  | 0.500 | -- |

| Band Nr. | Cal. Band Vol. |
|----------|----------------|
| Band 1   | 0.000          |

Lane 3: Lane 3

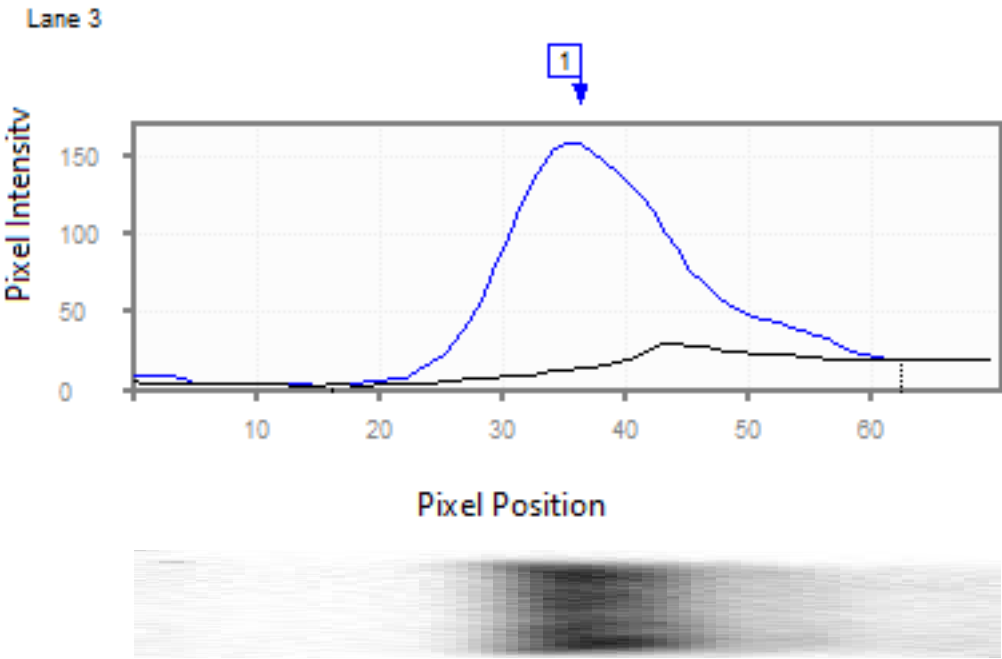

Method: Rolling Ball, Parameter: 20

| Band Nr. | Band N. | Band Vol.   | Backgr. Vol. | RF    | MW |
|----------|---------|-------------|--------------|-------|----|
| Band 1   | 1       | 247,469.000 | 79,123.000   | 0.514 | -- |

| Band Nr. | Cal. Band Vol. |
|----------|----------------|
| Band 1   | 0.000          |

Lane 4: Lane 4

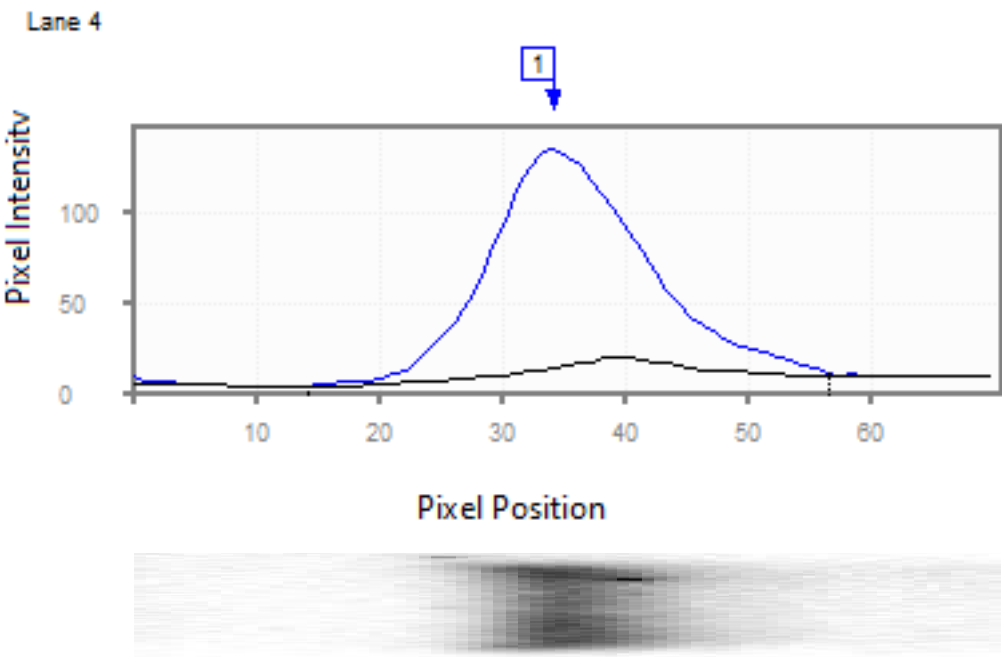

Method: Rolling Ball, Parameter: 20

| Band Nr. | Band N. | Band Vol.   | Backgr. Vol. | RF    | MW |
|----------|---------|-------------|--------------|-------|----|
| Band 1   | 1       | 189,251.000 | 51,421.000   | 0.486 | -- |

| Band Nr. | Cal. Band Vol. |
|----------|----------------|
| Band 1   | 0.000          |

Lane 5: Lane 5

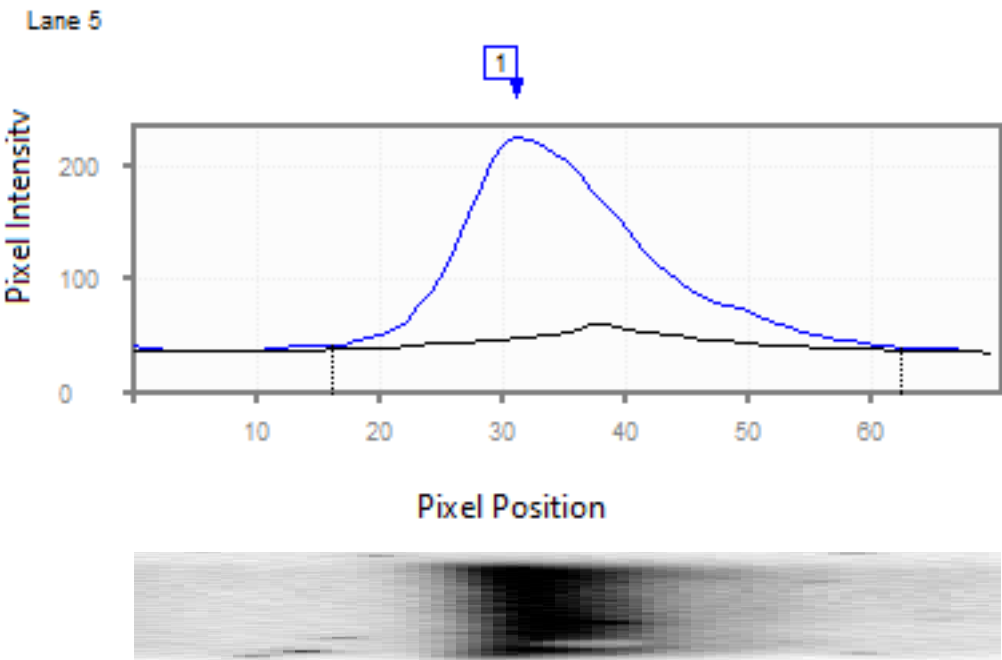

Method: Rolling Ball, Parameter: 20

| Band Nr. | Band N. | Band Vol.   | Backgr. Vol. | RF    | MW |
|----------|---------|-------------|--------------|-------|----|
| Band 1   | 1       | 308,639.000 | 228,366.000  | 0.443 | -- |

| Band Nr. | Cal. Band Vol. |
|----------|----------------|
| Band 1   | 0.000          |

Lane 6: Lane 6

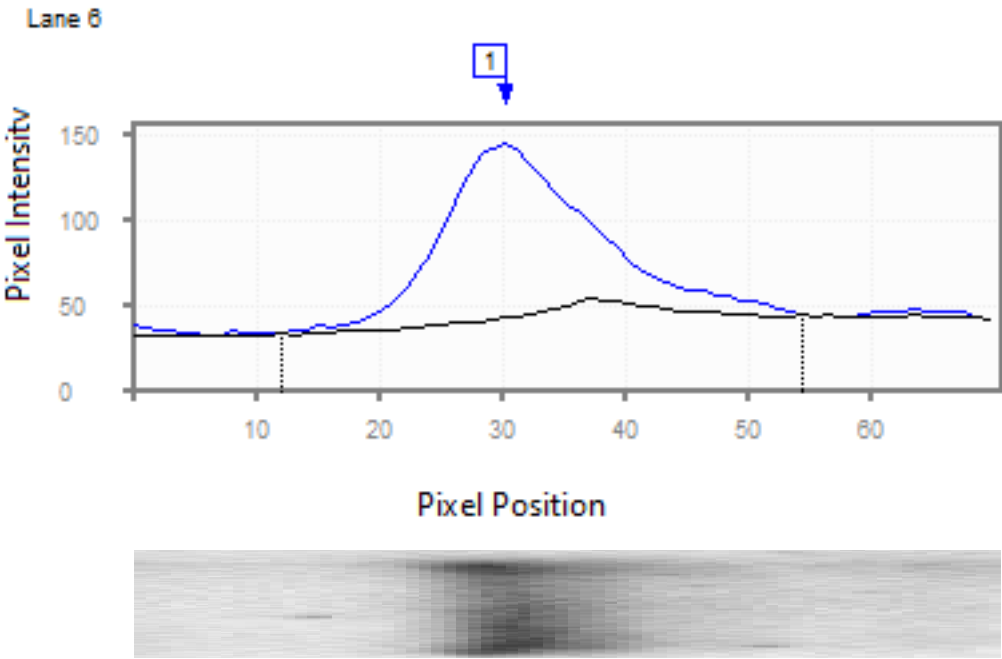

Method: Rolling Ball, Parameter: 20

| Band Nr. | Band N. | Band Vol.   | Backgr. Vol. | RF    | MW |
|----------|---------|-------------|--------------|-------|----|
| Band 1   | 1       | 154,348.000 | 196,093.000  | 0.429 | -- |

| Band Nr. | Cal. Band Vol. |
|----------|----------------|
| Band 1   | 0.000          |
