# Supplementary material for: YB-1 Mediates TNF-Induced Pro-Survival Signaling by Regulating NF-κB Activation
Source: MDPI journal article supplement (doi:10.3390/cancers12082188), 2020-08-05
Supplement: s1 [file s1]

Single Lane Report with Profile Project pp65 1

Project Data:

|                  |                   |
|------------------|-------------------|
| Name:            | pp65 1            |
| Project Status:  | private           |
| User:            | anshah            |
| Date:            | 26.05.2020, 13:07 |
| Created at:      | 26.05.2020, 13:07 |
| Type of Project: | Protein Gel       |
| Comment:         | No Arguments      |

Gel Image:

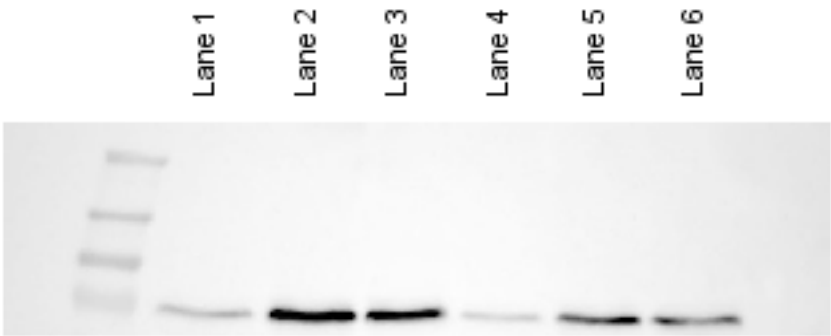

Lane 1: Lane 1

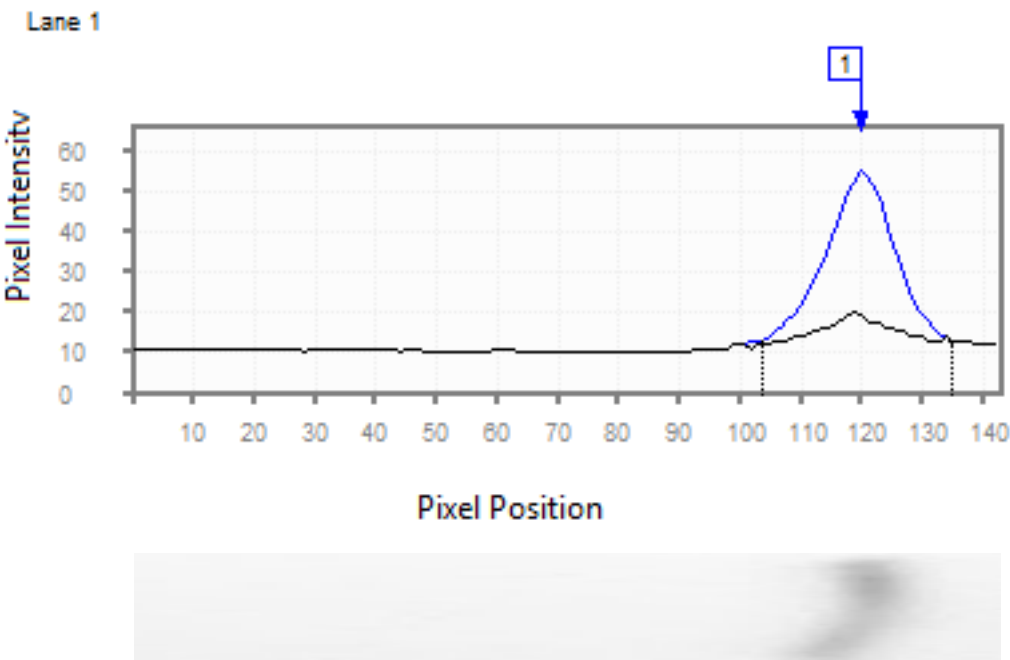

Method: Rolling Ball, Parameter: 20

| Band Nr. | Band N. | Band Vol.  | Backgr. Vol. | RF    | MW |
|----------|---------|------------|--------------|-------|----|
| Band 1   | 1       | 57,284.000 | 58,033.000   | 0.838 | -- |

| Band Nr. | Cal. Band Vol. |
|----------|----------------|
| Band 1   | 0.000          |

Lane 2: Lane 2

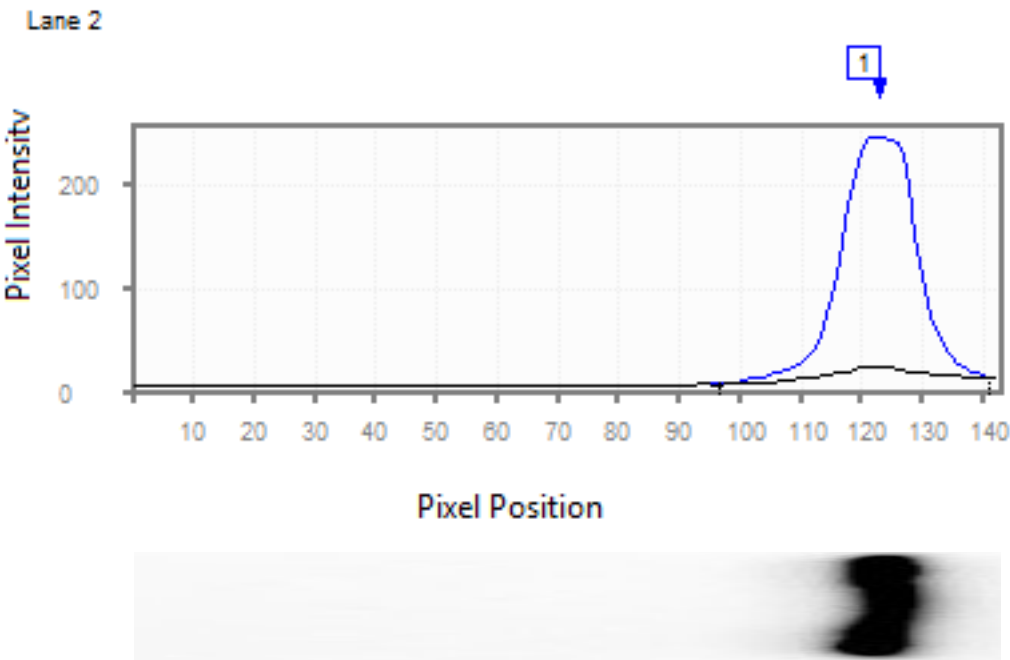

Method: Rolling Ball, Parameter: 20

| Band Nr. | Band N. | Band Vol.   | Backgr. Vol. | RF    | MW |
|----------|---------|-------------|--------------|-------|----|
| Band 1   | 1       | 365,154.000 | 79,456.000   | 0.859 | -- |

| Band Nr. | Cal. Band Vol. |
|----------|----------------|
| Band 1   | 0.000          |

Lane 3: Lane 3

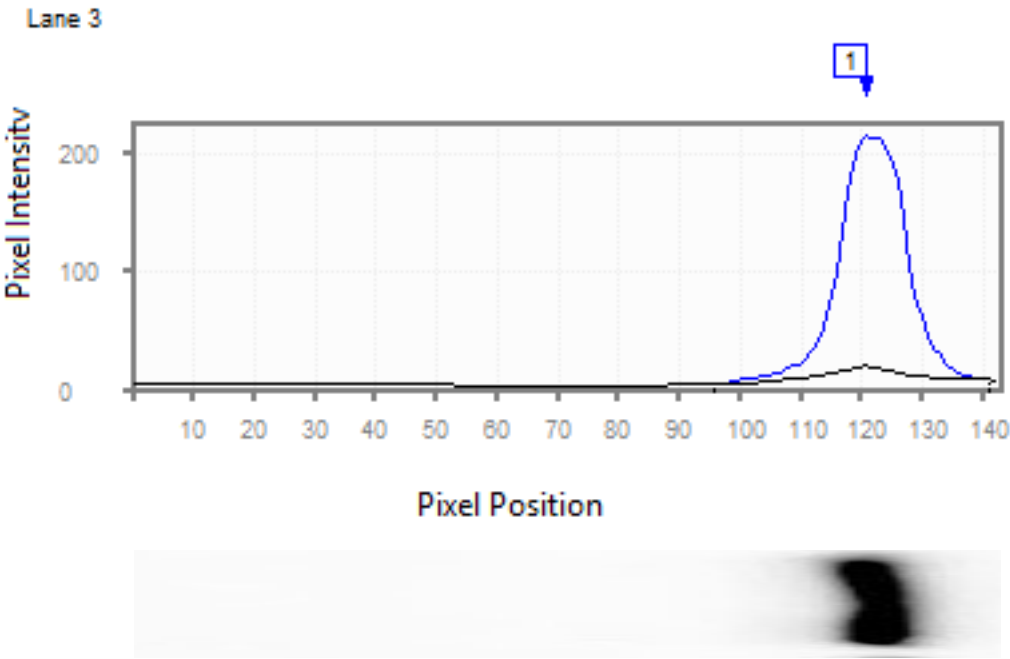

Method: Rolling Ball, Parameter: 20

| Band Nr. | Band N. | Band Vol.   | Backgr. Vol. | RF    | MW |
|----------|---------|-------------|--------------|-------|----|
| Band 1   | 1       | 288,415.000 | 59,450.000   | 0.845 | -- |

| Band Nr. | Cal. Band Vol. |
|----------|----------------|
| Band 1   | 0.000          |

Lane 4: Lane 4

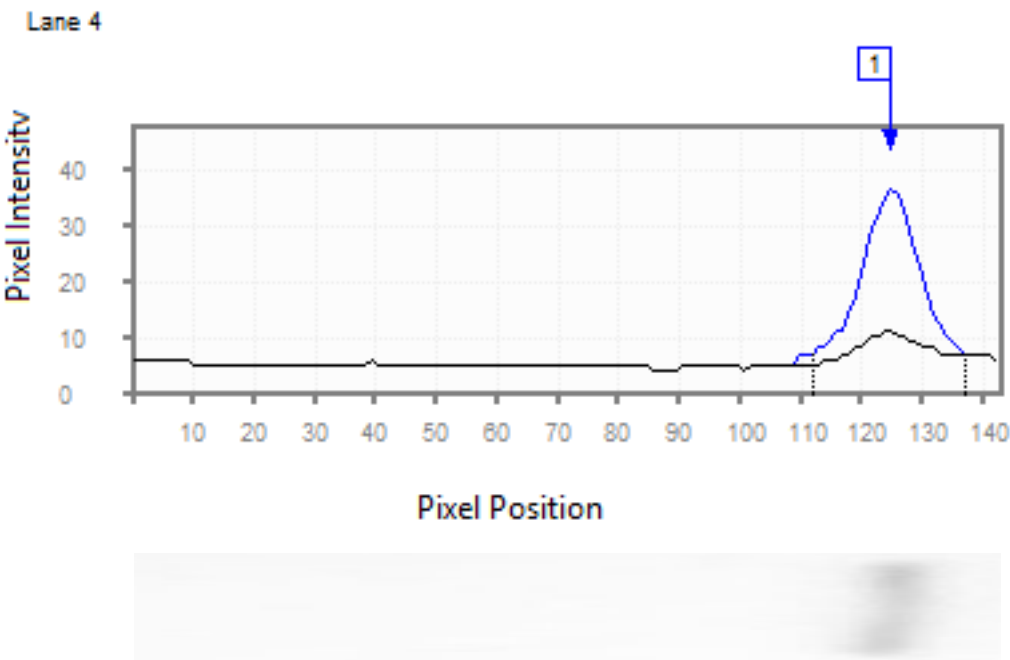

Method: Rolling Ball, Parameter: 20

| Band Nr. | Band N. | Band Vol.  | Backgr. Vol. | RF    | MW |
|----------|---------|------------|--------------|-------|----|
| Band 1   | 1       | 31,317.000 | 23,605.000   | 0.873 | -- |

| Band Nr. | Cal. Band Vol. |
|----------|----------------|
| Band 1   | 0.000          |

Lane 5: Lane 5

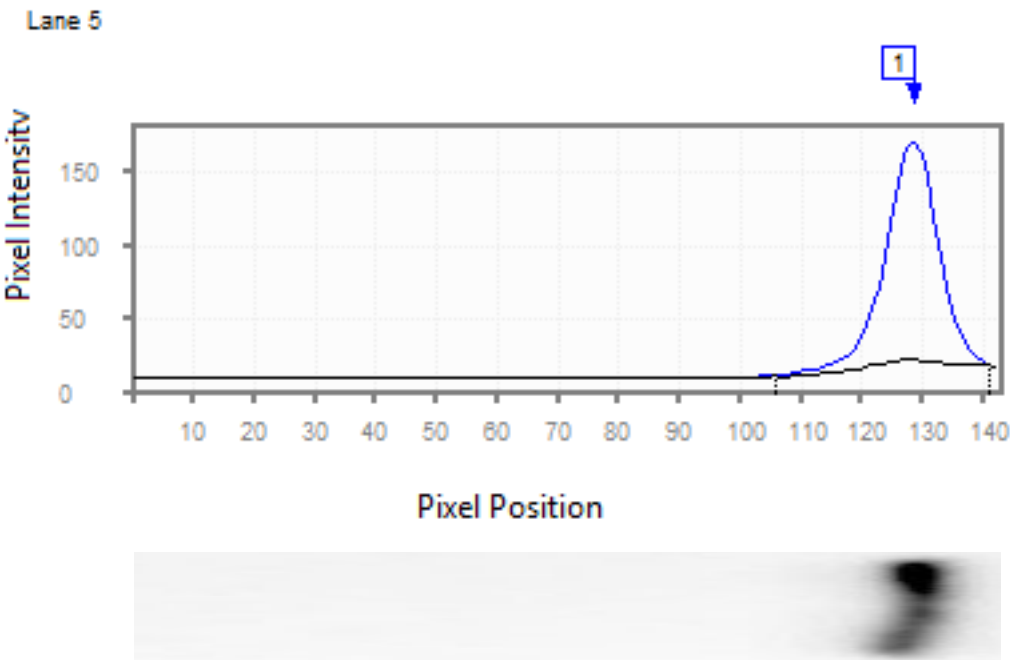

Method: Rolling Ball, Parameter: 20

| Band Nr. | Band N. | Band Vol.   | Backgr. Vol. | RF    | MW |
|----------|---------|-------------|--------------|-------|----|
| Band 1   | 1       | 173,337.000 | 67,616.000   | 0.901 | -- |

| Band Nr. | Cal. Band Vol. |
|----------|----------------|
| Band 1   | 0.000          |

Lane 6: Lane 6

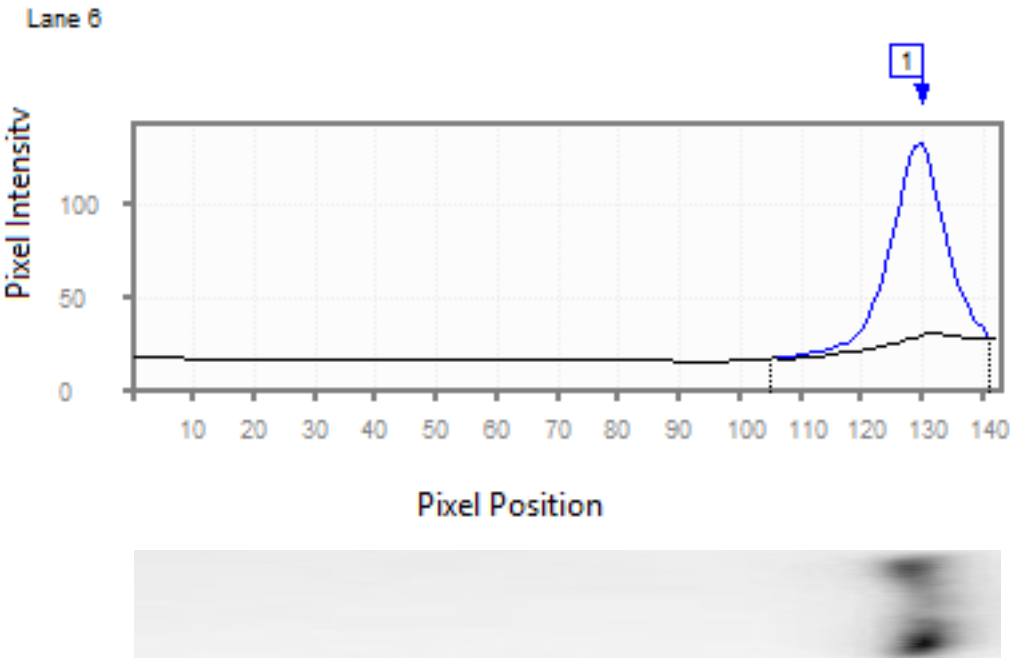

| Band Nr. | Band N. | Band Vol.   | Backgr. Vol. | RF    | MW |
|----------|---------|-------------|--------------|-------|----|
| Band 1   | 1       | 123,023.000 | 95,493.000   | 0.908 | -- |

| Band Nr. | Cal. Band Vol. |
|----------|----------------|
| Band 1   | 0.000          |
