# Supplementary material for: YB-1 Mediates TNF-Induced Pro-Survival Signaling by Regulating NF-κB Activation
Source: MDPI journal article supplement (doi:10.3390/cancers12082188), 2020-08-05
Supplement: s1 [file s1]

Single Lane Report with Profile Project 2020-01-14 THP1 stimulation # TNFR1,19-10.

Project Data:

|                  |                                                     |
|------------------|-----------------------------------------------------|
| Name:            | 2020-01-14 THP1 stimulation # TNFR1,19-10. scan_raw |
| Project Status:  | private                                             |
| User:            | anshah                                              |
| Date:            | 28.05.2020, 09:54                                   |
| Created at:      | 28.05.2020, 09:54                                   |
| Type of Project: | Protein Gel                                         |
| Comment:         | No Arguments                                        |

Gel Image:

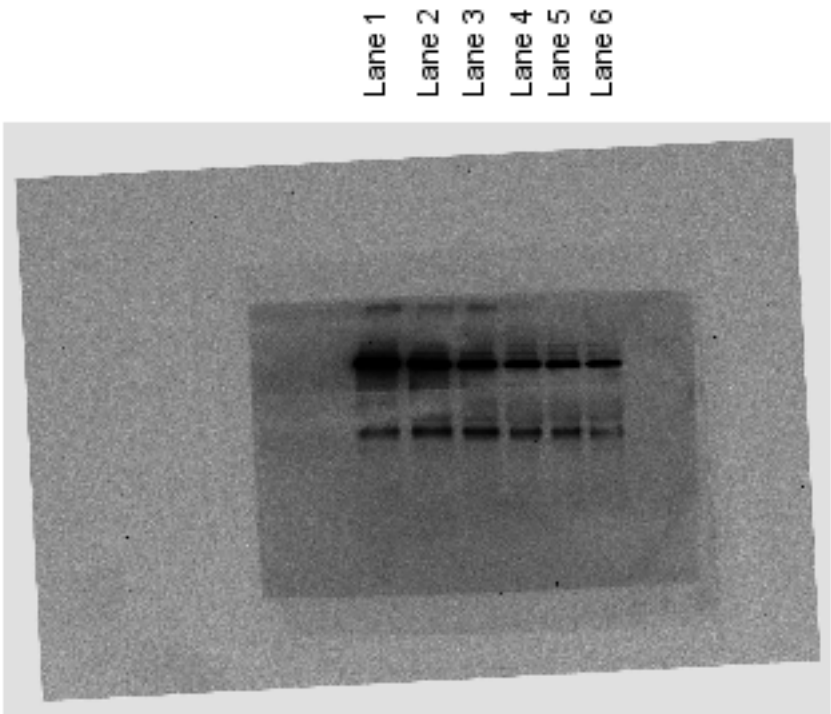

Lane 1: Lane 1

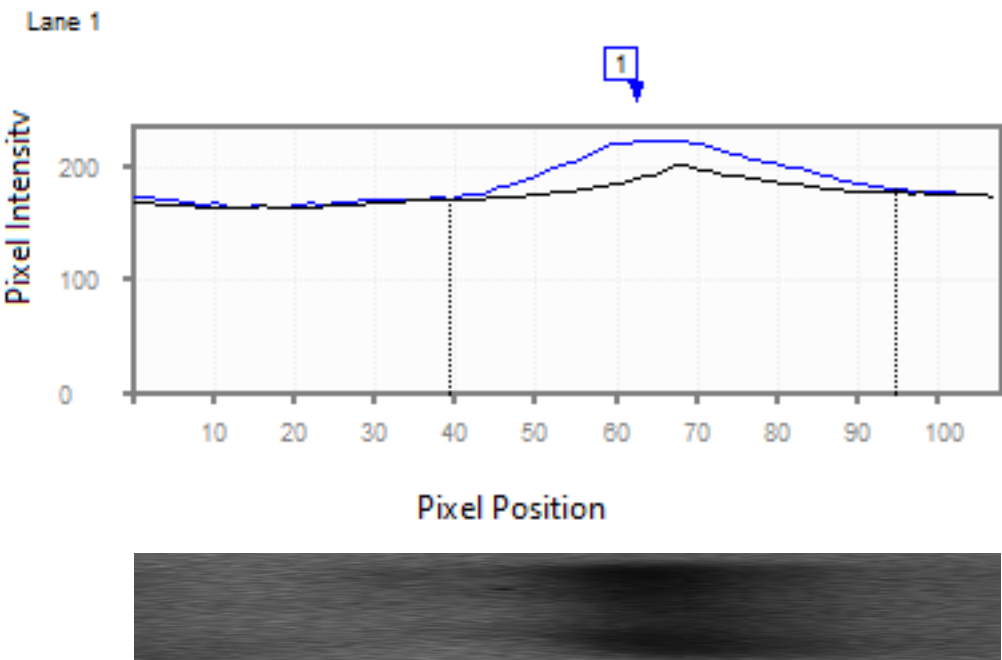

Method: Rolling Ball, Parameter: 20

| Band Nr. | Band N. | Band Vol.   | Backgr. Vol.  | RF    | MW |
|----------|---------|-------------|---------------|-------|----|
| Band 1   | 1       | 123,669.000 | 1,316,670.000 | 0.579 | -- |

| Band Nr. | Cal. Band Vol. |
|----------|----------------|
| Band 1   | 0.000          |

Lane 2: Lane 2

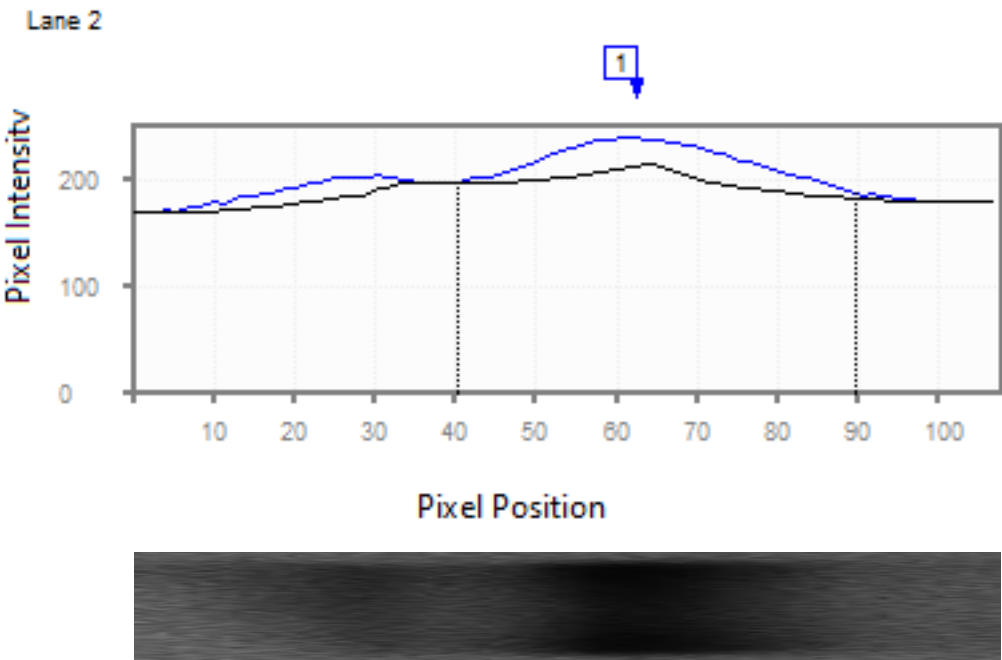

Method: Rolling Ball, Parameter: 20

| Band Nr. | Band N. | Band Vol.   | Backgr. Vol.  | RF    | MW |
|----------|---------|-------------|---------------|-------|----|
| Band 1   | 1       | 124,336.000 | 1,258,761.000 | 0.579 | -- |

| Band Nr. | Cal. Band Vol. |
|----------|----------------|
| Band 1   | 0.000          |

Lane 3: Lane 3

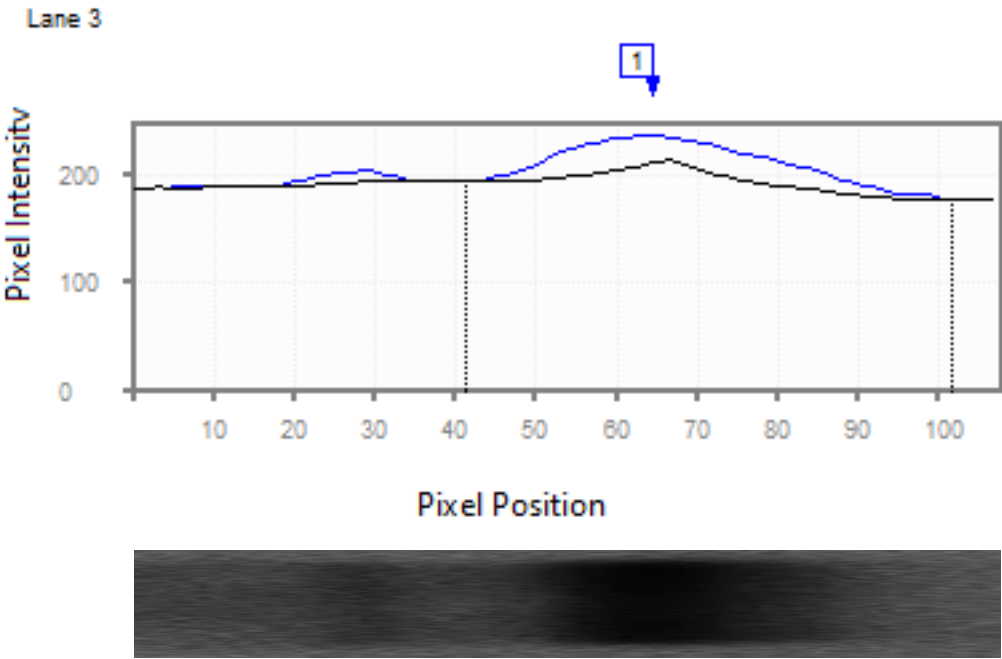

| Band Nr. | Band N. | Band Vol.   | Backgr. Vol.  | RF    | MW |
|----------|---------|-------------|---------------|-------|----|
| Band 1   | 1       | 130,595.000 | 1,498,476.000 | 0.598 | -- |

| Band Nr. | Cal. Band Vol. |
|----------|----------------|
| Band 1   | 0.000          |

Lane 4: Lane 4

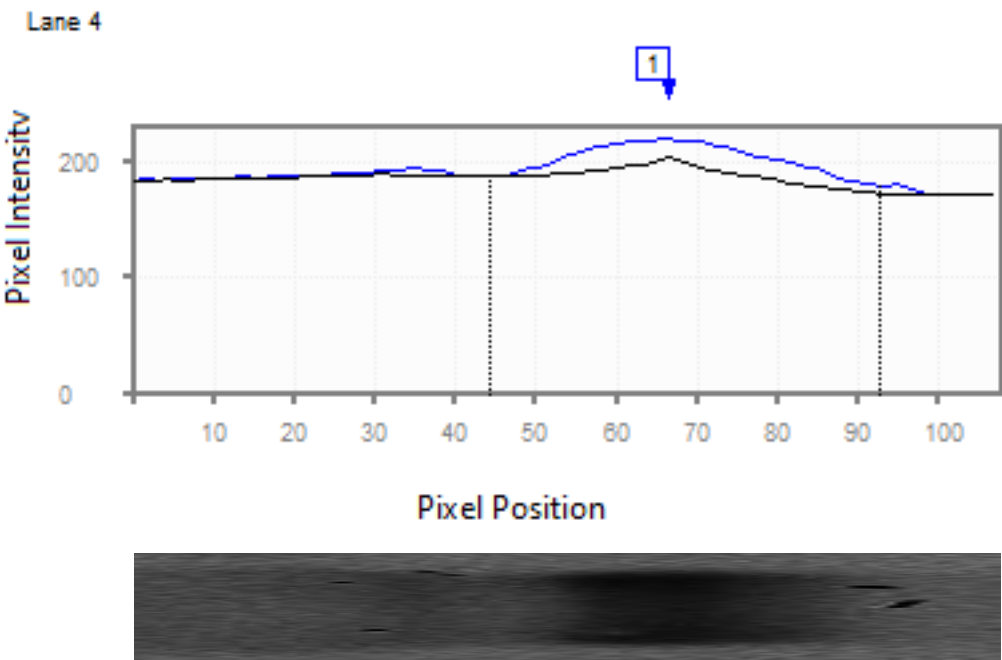

Method: Rolling Ball, Parameter: 20

| Band Nr. | Band N. | Band Vol.  | Backgr. Vol.  | RF    | MW |
|----------|---------|------------|---------------|-------|----|
| Band 1   | 1       | 93,150.000 | 1,175,694.000 | 0.617 | -- |

| Band Nr. | Cal. Band Vol. |
|----------|----------------|
| Band 1   | 0.000          |

Lane 5: Lane 5

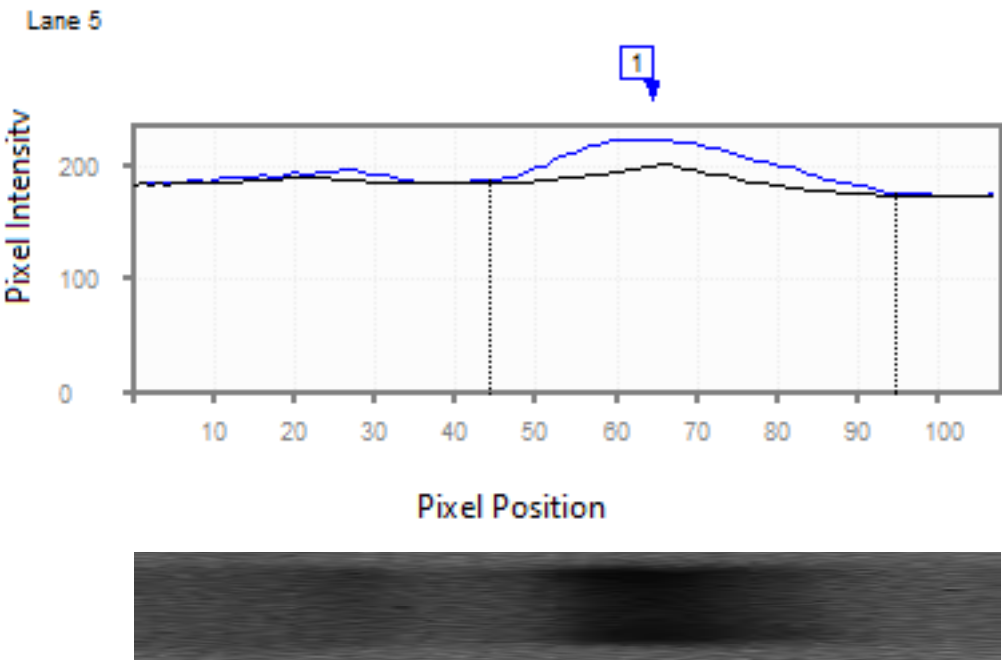

Method: Rolling Ball, Parameter: 20

| Band Nr. | Band N. | Band Vol.  | Backgr. Vol.  | RF    | MW |
|----------|---------|------------|---------------|-------|----|
| Band 1   | 1       | 95,339.000 | 1,049,512.000 | 0.598 | -- |

| Band Nr. | Cal. Band Vol. |
|----------|----------------|
| Band 1   | 0.000          |

Lane 6: Lane 6

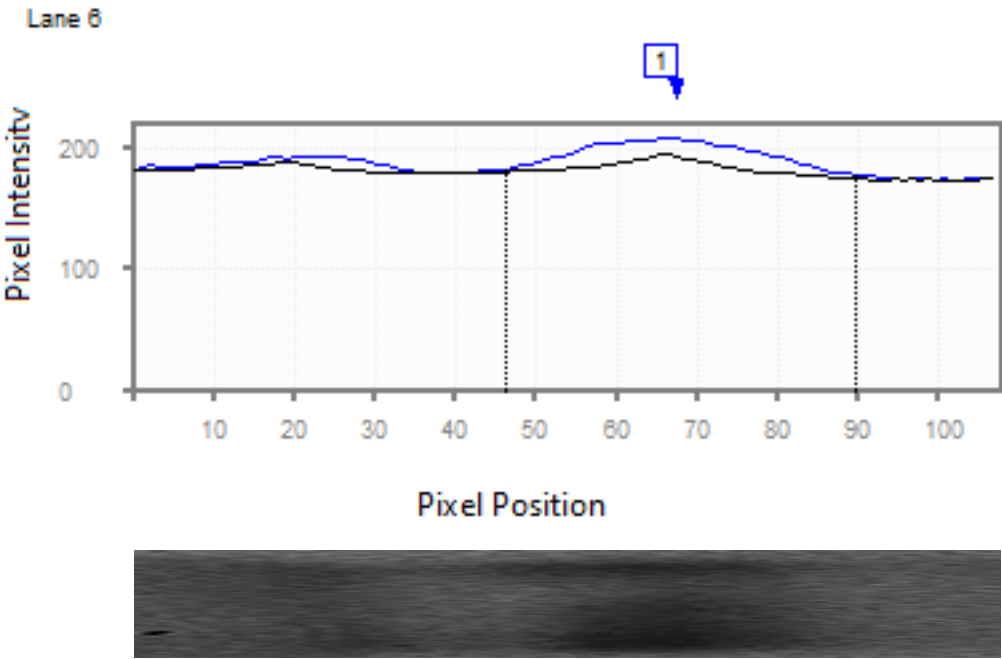

Method: Rolling Ball, Parameter: 20

| Band Nr. | Band N. | Band Vol.  | Backgr. Vol. | RF    | MW |
|----------|---------|------------|--------------|-------|----|
| Band 1   | 1       | 59,025.000 | 883,119.000  | 0.626 | -- |

| Band Nr. | Cal. Band Vol. |
|----------|----------------|
| Band 1   | 0.000          |
