# Supplementary material for: YB-1 Mediates TNF-Induced Pro-Survival Signaling by Regulating NF-κB Activation
Source: MDPI journal article supplement (doi:10.3390/cancers12082188), 2020-08-05
Supplement: s1 [file s1]

Single Lane Report with Profile Project TNFR1

|                  |                   |
|------------------|-------------------|
| Project Data:    |                   |
| Name:            | TNFR1             |
| Project Status:  | private           |
| User:            | anshah            |
| Date:            | 26.05.2020, 13:29 |
| Created at:      | 26.05.2020, 13:29 |
| Type of Project: | Protein Gel       |
| Comment:         | No Arguments      |

Gel Image:

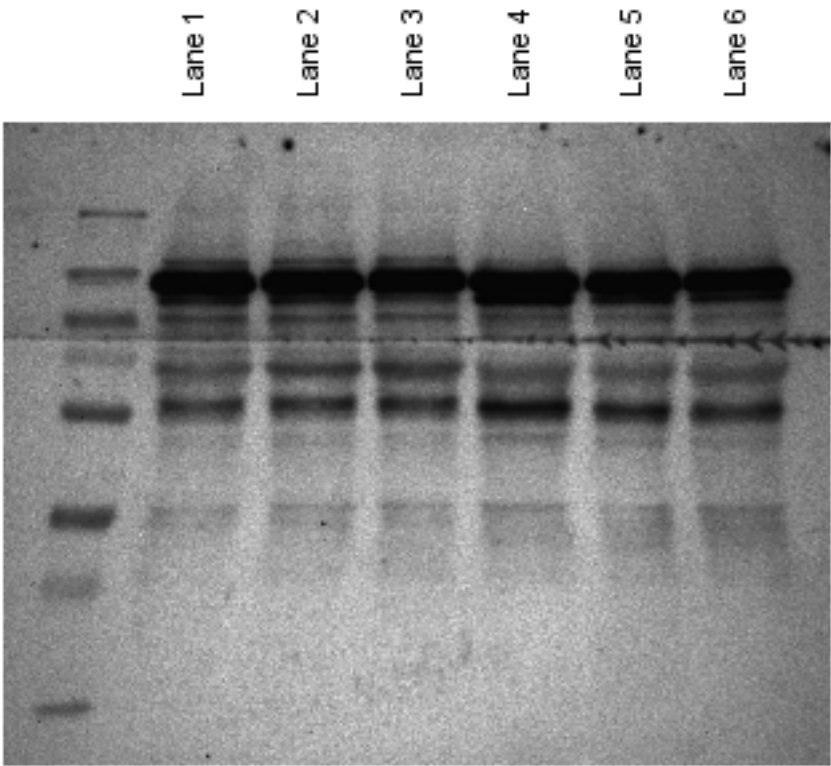

Lane 1: Lane 1

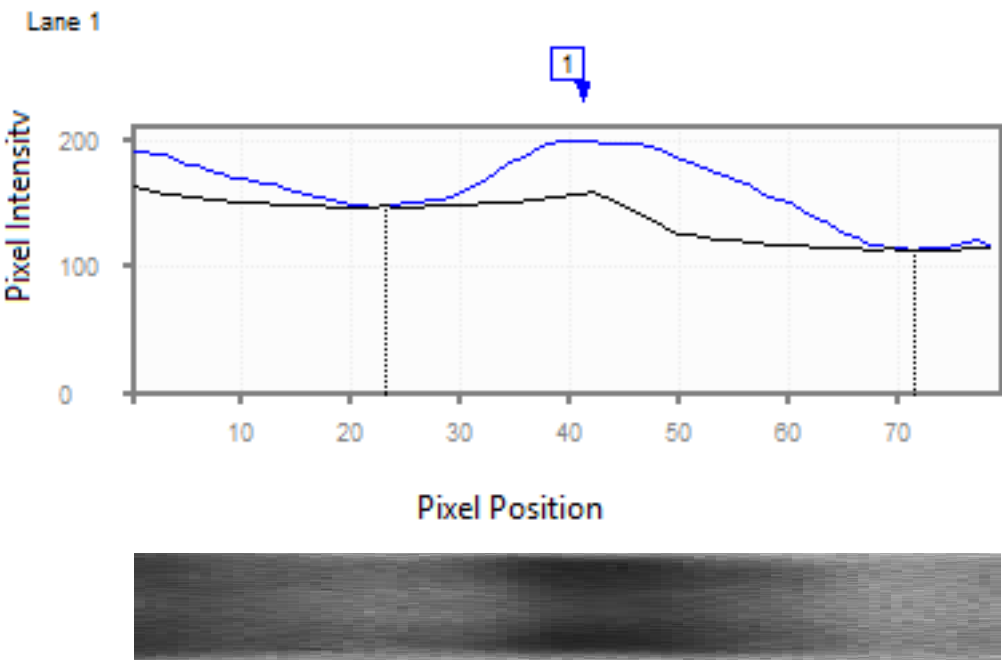

| Band Nr. | Band N. | Band Vol.   | Backgr. Vol. | RF    | MW |
|----------|---------|-------------|--------------|-------|----|
| Band 1   | 1       | 158,615.000 | 698,400.000  | 0.519 | -- |

| Band Nr. | Cal. Band Vol. |
|----------|----------------|
| Band 1   | 0.000          |

Lane 2: Lane 2

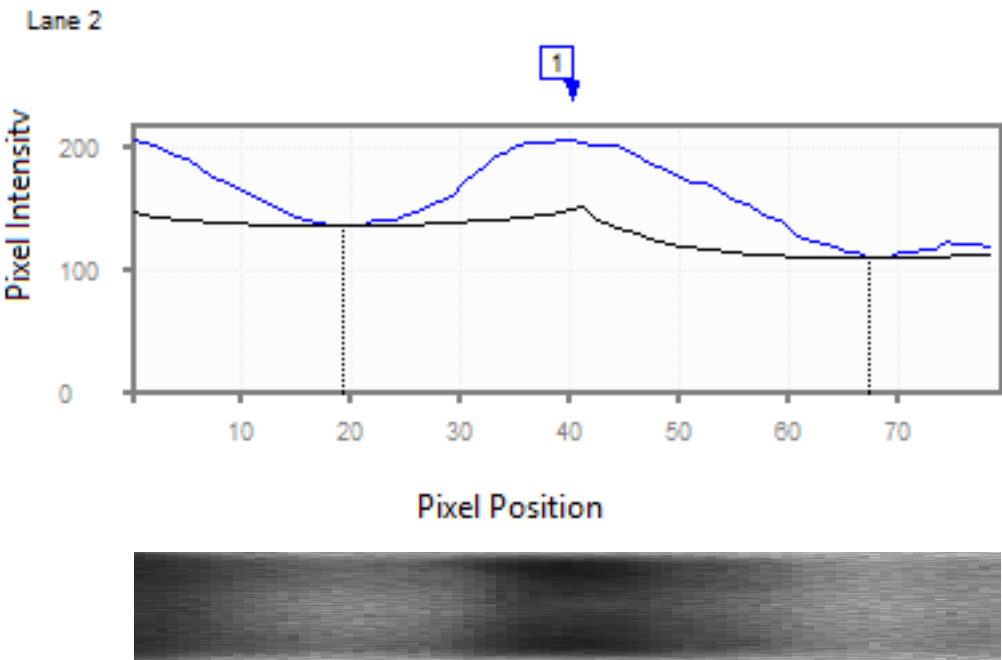

| Band Nr. | Band N. | Band Vol.   | Backgr. Vol. | RF    | MW |
|----------|---------|-------------|--------------|-------|----|
| Band 1   | 1       | 185,403.000 | 669,056.000  | 0.506 | -- |

| Band Nr. | Cal. Band Vol. |
|----------|----------------|
| Band 1   | 0.000          |

Lane 3: Lane 3

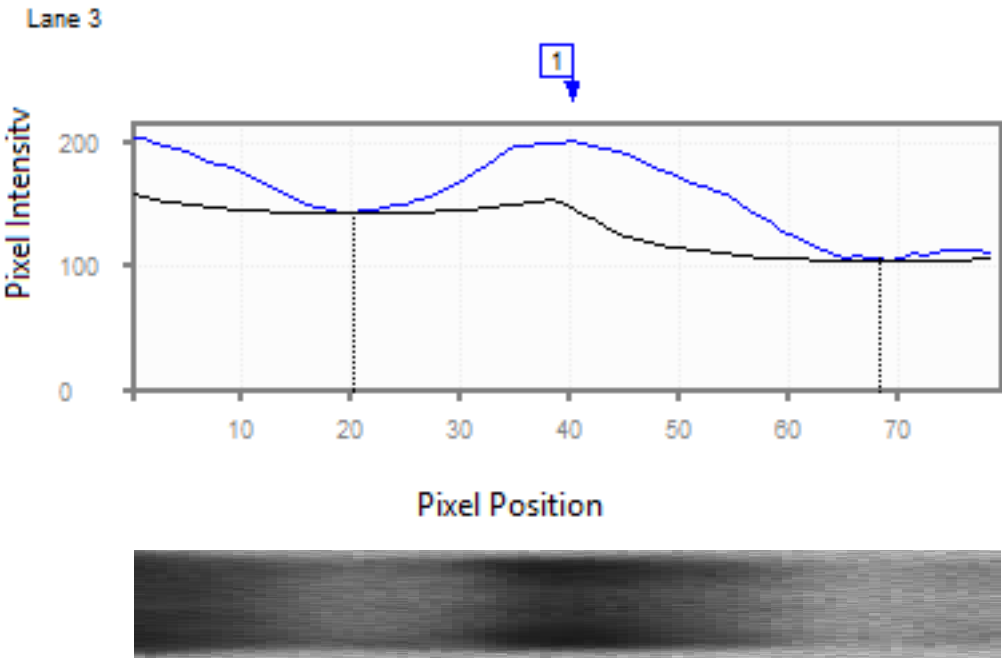

Method: Rolling Ball, Parameter: 20

| Band Nr. | Band N. | Band Vol.   | Backgr. Vol. | RF    | MW |
|----------|---------|-------------|--------------|-------|----|
| Band 1   | 1       | 171,292.000 | 667,012.000  | 0.506 | -- |

| Band Nr. | Cal. Band Vol. |
|----------|----------------|
| Band 1   | 0.000          |

Lane 4: Lane 4

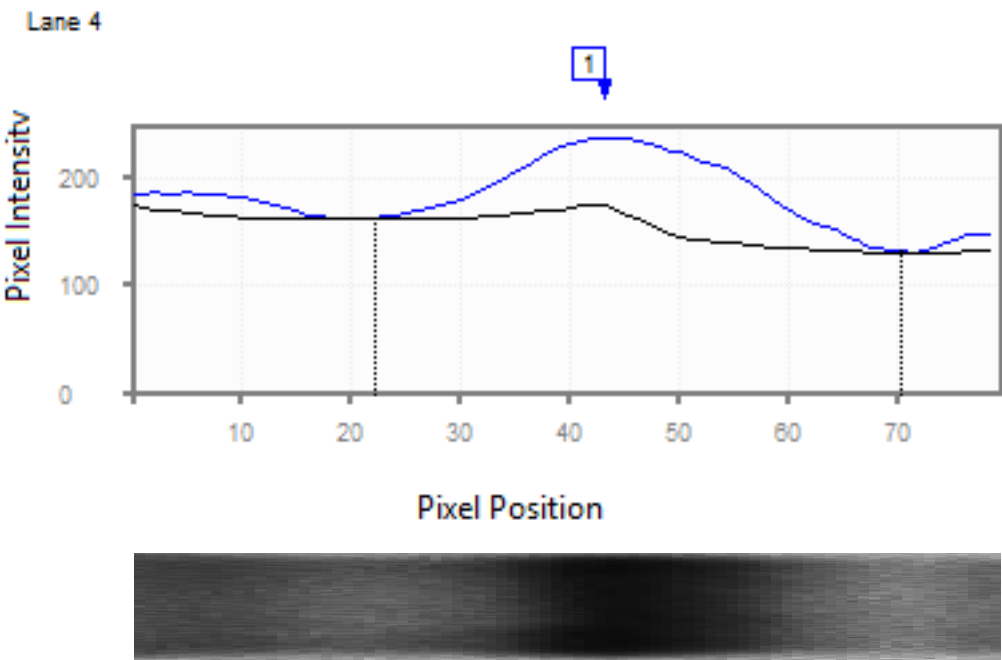

Method: Rolling Ball, Parameter: 20

| Band Nr. | Band N. | Band Vol.   | Backgr. Vol. | RF    | MW |
|----------|---------|-------------|--------------|-------|----|
| Band 1   | 1       | 217,208.000 | 837,383.000  | 0.544 | -- |

| Band Nr. | Cal. Band Vol. |
|----------|----------------|
| Band 1   | 0.000          |

Lane 5: Lane 5

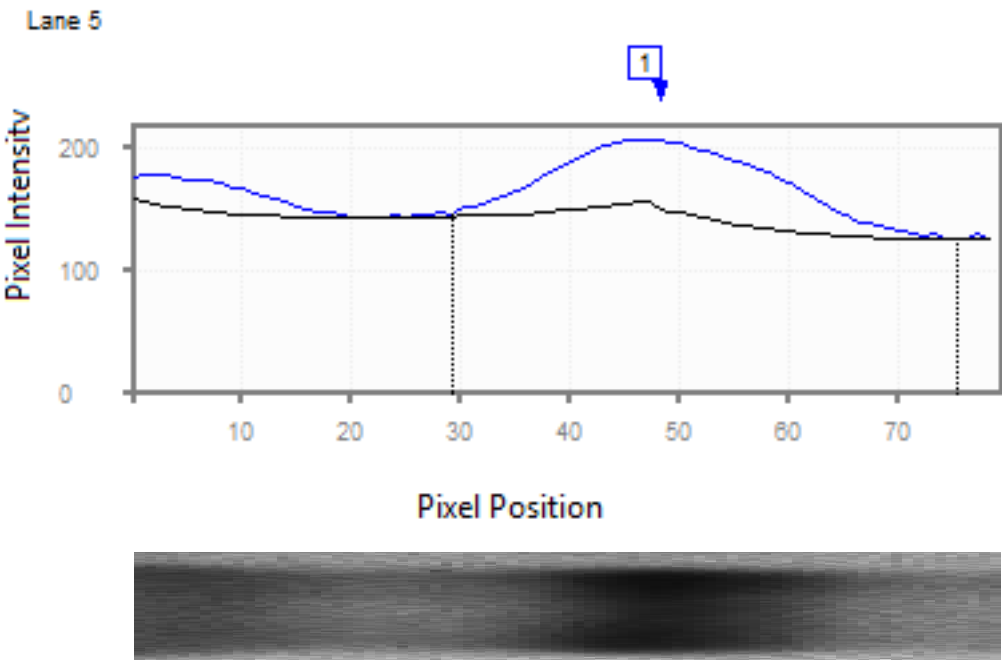

Method: Rolling Ball, Parameter: 20

| Band Nr. | Band N. | Band Vol.   | Backgr. Vol. | RF    | MW |
|----------|---------|-------------|--------------|-------|----|
| Band 1   | 1       | 162,075.000 | 734,110.000  | 0.608 | -- |

| Band Nr. | Cal. Band Vol. |
|----------|----------------|
| Band 1   | 0.000          |

Lane 6: Lane 6

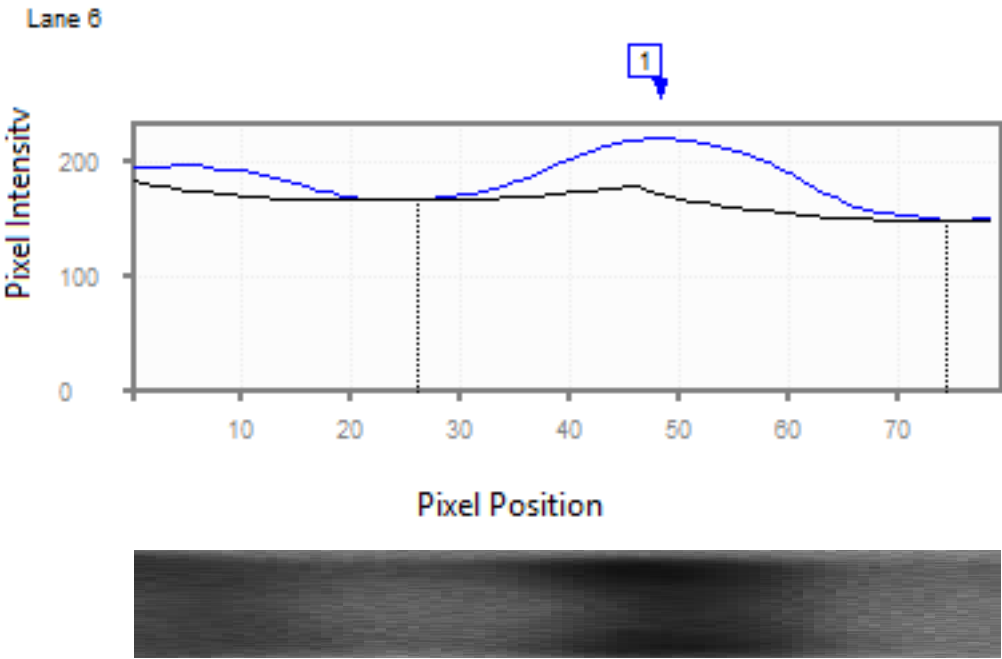

Method: Rolling Ball, Parameter: 20

| Band Nr. | Band N. | Band Vol.   | Backgr. Vol. | RF    | MW |
|----------|---------|-------------|--------------|-------|----|
| Band 1   | 1       | 138,678.000 | 883,479.000  | 0.608 | -- |

| Band Nr. | Cal. Band Vol. |
|----------|----------------|
| Band 1   | 0.000          |
