# Supplementary material for: YB-1 Mediates TNF-Induced Pro-Survival Signaling by Regulating NF-κB Activation
Source: MDPI journal article supplement (doi:10.3390/cancers12082188), 2020-08-05
Supplement: s1 [file s1]

Single Lane Report with Profile Project p65

Project Data:

|                  |                   |
|------------------|-------------------|
| Name:            | p65               |
| Project Status:  | private           |
| User:            | anshah            |
| Date:            | 26.05.2020, 13:23 |
| Created at:      | 26.05.2020, 13:23 |
| Type of Project: | Protein Gel       |
| Comment:         | No Arguments      |

Gel Image:

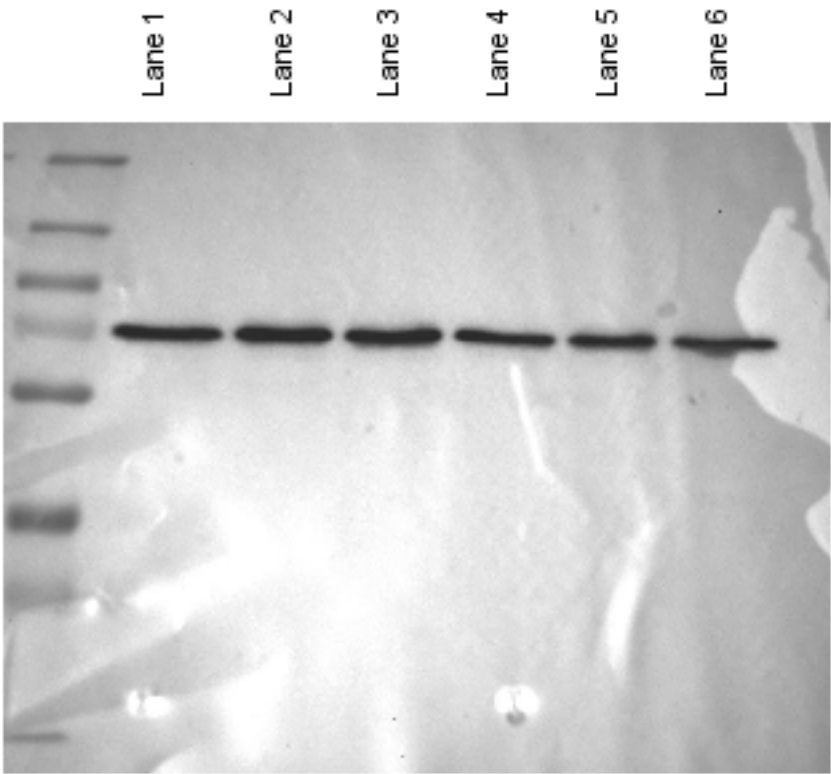

Lane 1: Lane 1

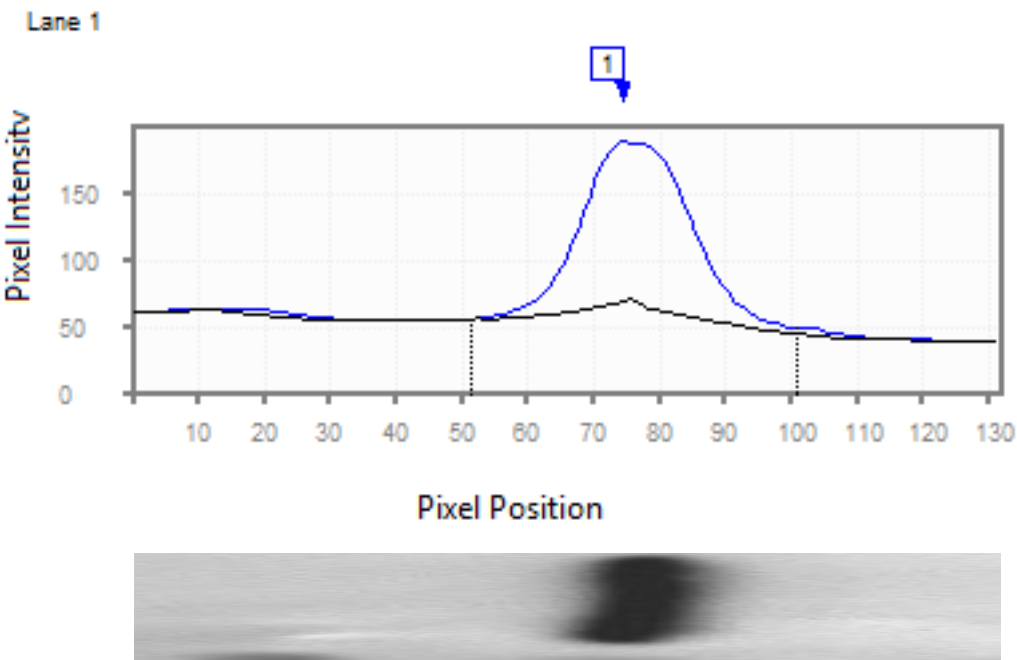

| Band Nr. | Band N. | Band Vol.   | Backgr. Vol. | RF    | MW |
|----------|---------|-------------|--------------|-------|----|
| Band 1   | 1       | 354,175.000 | 420,700.000  | 0.565 | -- |

| Band Nr. | Cal. Band Vol. |
|----------|----------------|
| Band 1   | 0.000          |

Lane 2: Lane 2

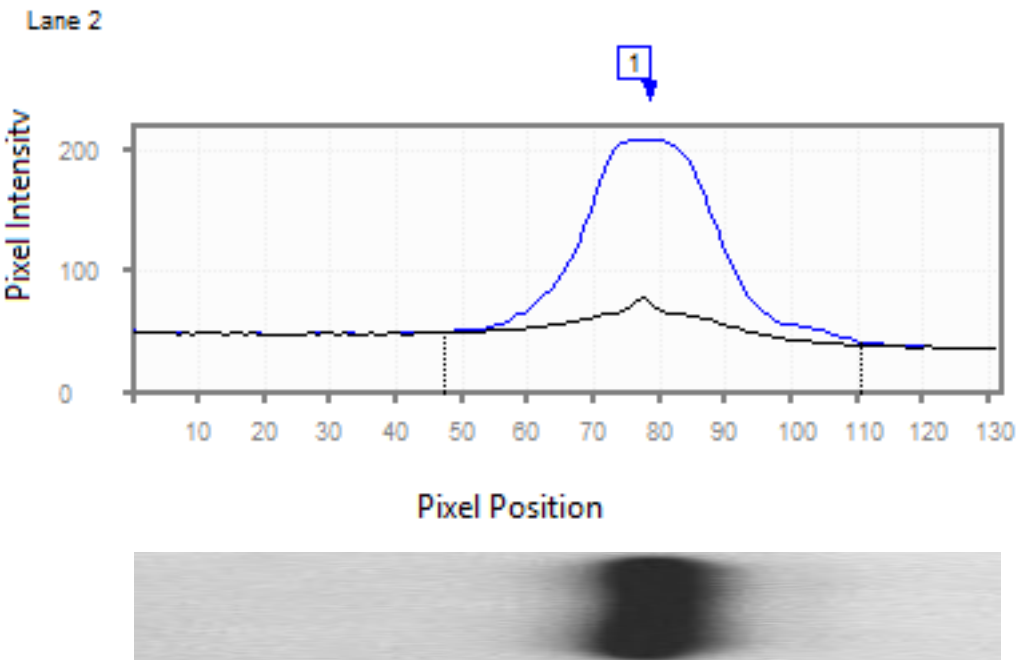

| Band Nr. | Band N. | Band Vol.   | Backgr. Vol. | RF    | MW |
|----------|---------|-------------|--------------|-------|----|
| Band 1   | 1       | 368,130.000 | 386,590.000  | 0.595 | -- |

| Band Nr. | Cal. Band Vol. |
|----------|----------------|
| Band 1   | 0.000          |

Lane 3: Lane 3

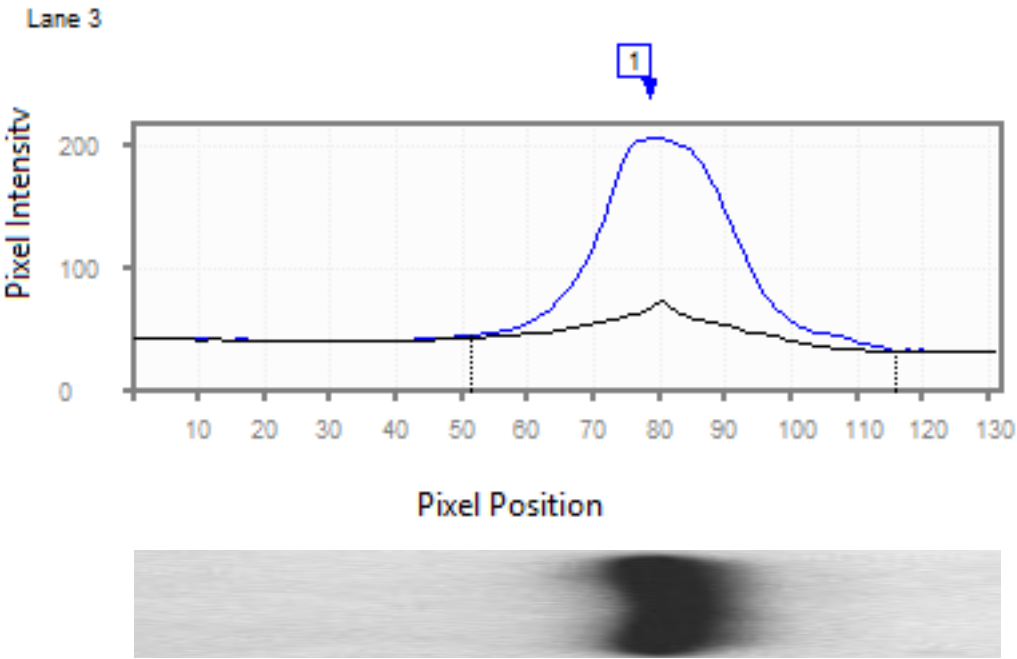

Method: Rolling Ball, Parameter: 20

| Band Nr. | Band N. | Band Vol.   | Backgr. Vol. | RF    | MW |
|----------|---------|-------------|--------------|-------|----|
| Band 1   | 1       | 389,227.000 | 359,306.000  | 0.595 | -- |

| Band Nr. | Cal. Band Vol. |
|----------|----------------|
| Band 1   | 0.000          |

Lane 4: Lane 4

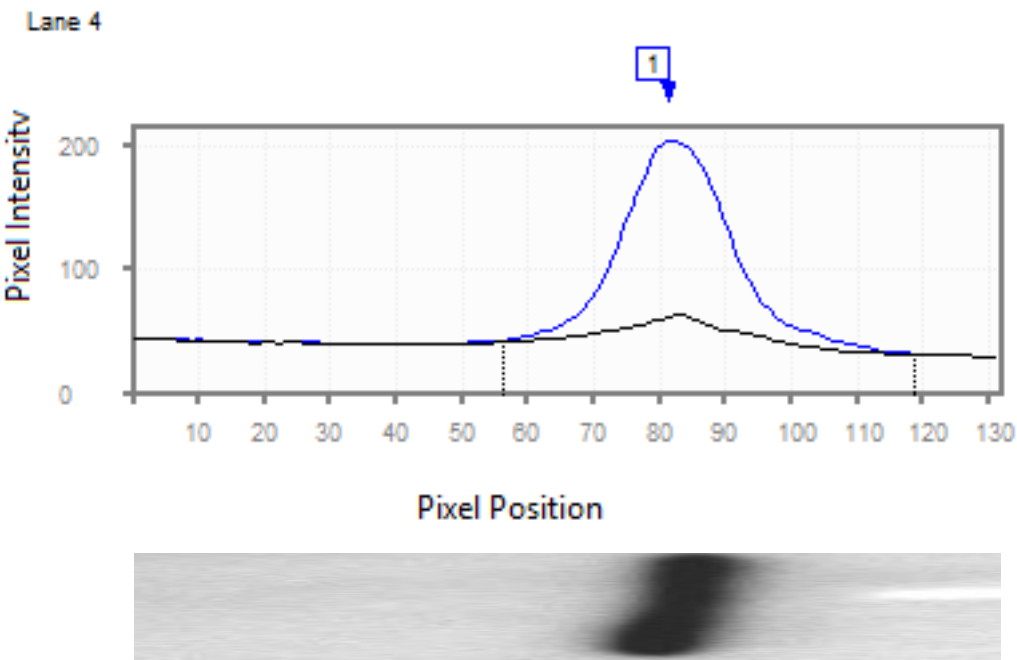

| Band Nr. | Band N. | Band Vol.   | Backgr. Vol. | RF    | MW |
|----------|---------|-------------|--------------|-------|----|
| Band 1   | 1       | 323,173.000 | 326,730.000  | 0.618 | -- |

| Band Nr. | Cal. Band Vol. |
|----------|----------------|
| Band 1   | 0.000          |

Lane 5: Lane 5

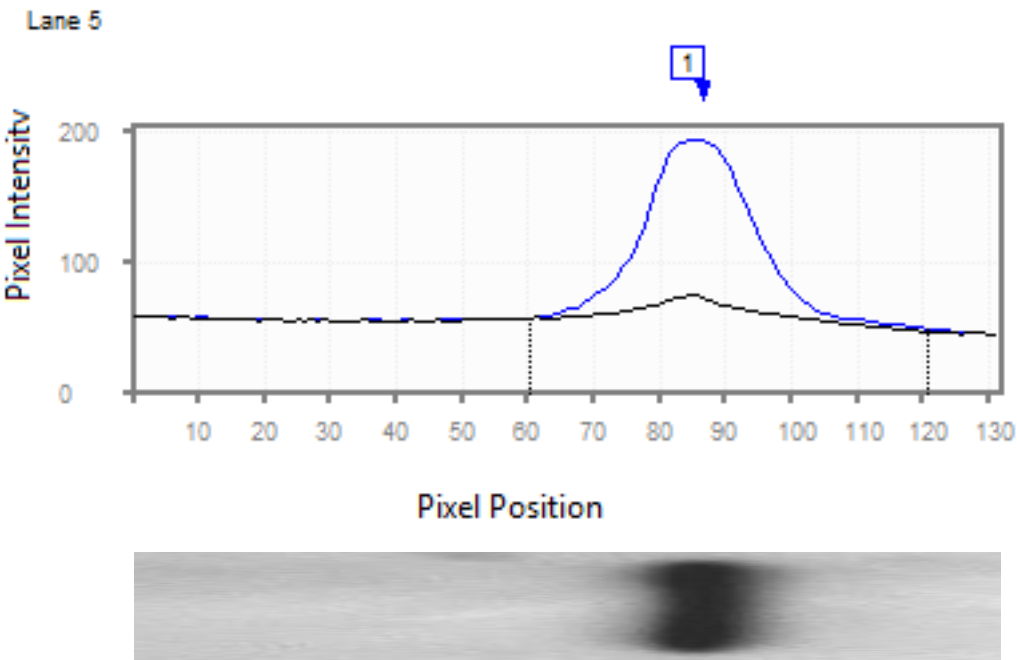

| Band Nr. | Band N. | Band Vol.   | Backgr. Vol. | RF    | MW |
|----------|---------|-------------|--------------|-------|----|
| Band 1   | 1       | 273,349.000 | 414,825.000  | 0.656 | -- |

| Band Nr. | Cal. Band Vol. |
|----------|----------------|
| Band 1   | 0.000          |

Lane 6: Lane 6

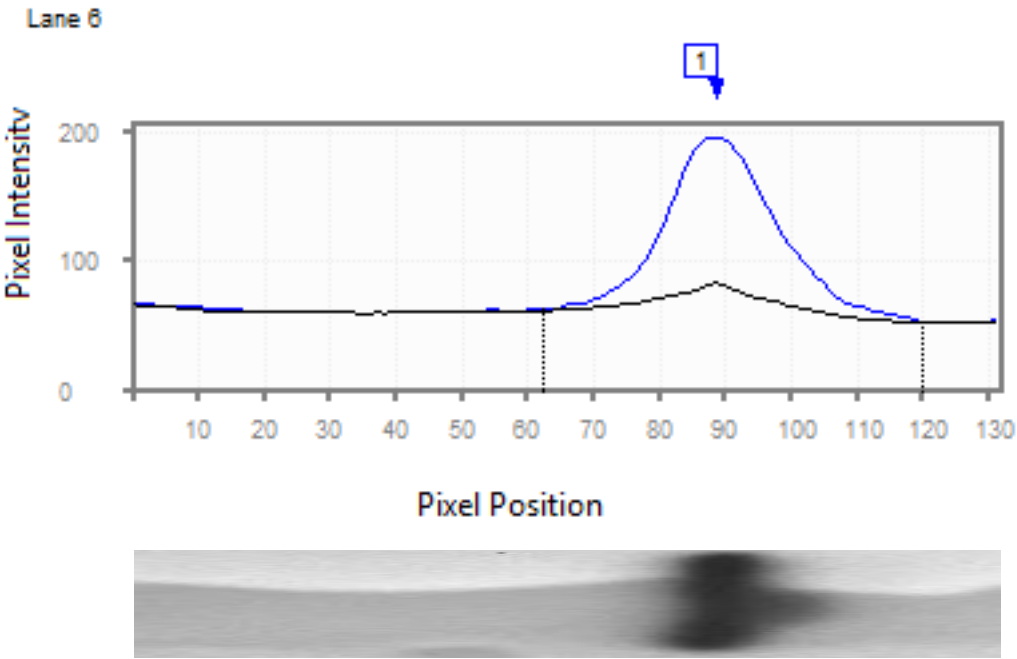

Method: Rolling Ball, Parameter: 20

| Band Nr. | Band N. | Band Vol.   | Backgr. Vol. | RF    | MW |
|----------|---------|-------------|--------------|-------|----|
| Band 1   | 1       | 287,691.000 | 474,906.000  | 0.672 | -- |

| Band Nr. | Cal. Band Vol. |
|----------|----------------|
| Band 1   | 0.000          |
