# Supplementary material for: YB-1 Mediates TNF-Induced Pro-Survival Signaling by Regulating NF-κB Activation
Source: MDPI journal article supplement (doi:10.3390/cancers12082188), 2020-08-05
Supplement: s1 [file s1]

Single Lane Report with Profile Project 2019-10-18 Stimulation 30 60#pp65-p-Ikba,13-7.

|                  |                                                         |
|------------------|---------------------------------------------------------|
| Project Data:    |                                                         |
| Name:            | 2019-10-18 Stimulation 30 60#pp65-p-Ikba,13-7. scan_raw |
| Project Status:  | private                                                 |
| User:            | anshah                                                  |
| Date:            | 28.05.2020, 10:07                                       |
| Created at:      | 28.05.2020, 10:07                                       |
| Type of Project: | Protein Gel                                             |
| Comment:         | No Arguments                                            |

Gel Image:

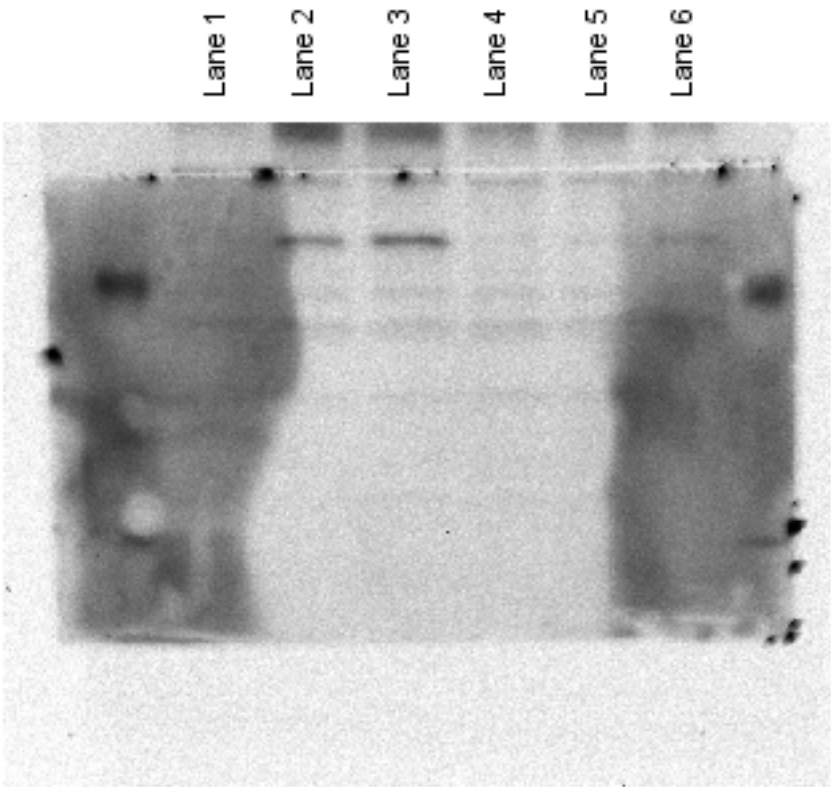

Lane 1: Lane 1

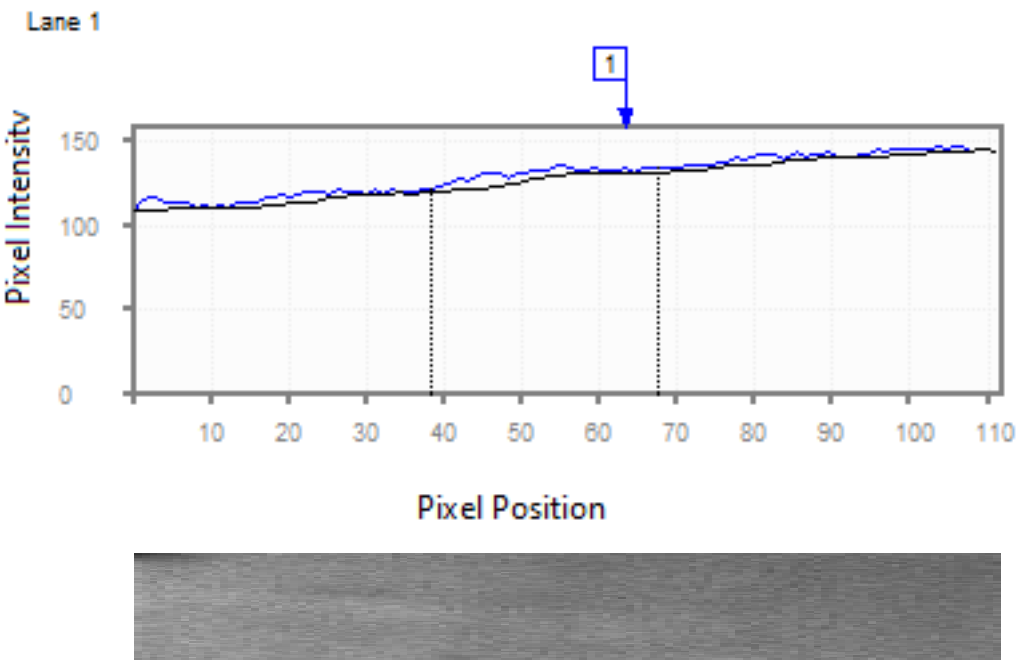

Method: Rolling Ball, Parameter: 20

| Band Nr. | Band N. | Band Vol. | Backgr. Vol. | RF    | MW |
|----------|---------|-----------|--------------|-------|----|
| Band 1   | 1       | 8,439.000 | 245,310.000  | 0.568 | -- |

| Band Nr. | Cal. Band Vol. |
|----------|----------------|
| Band 1   | 0.000          |

Lane 2: Lane 2

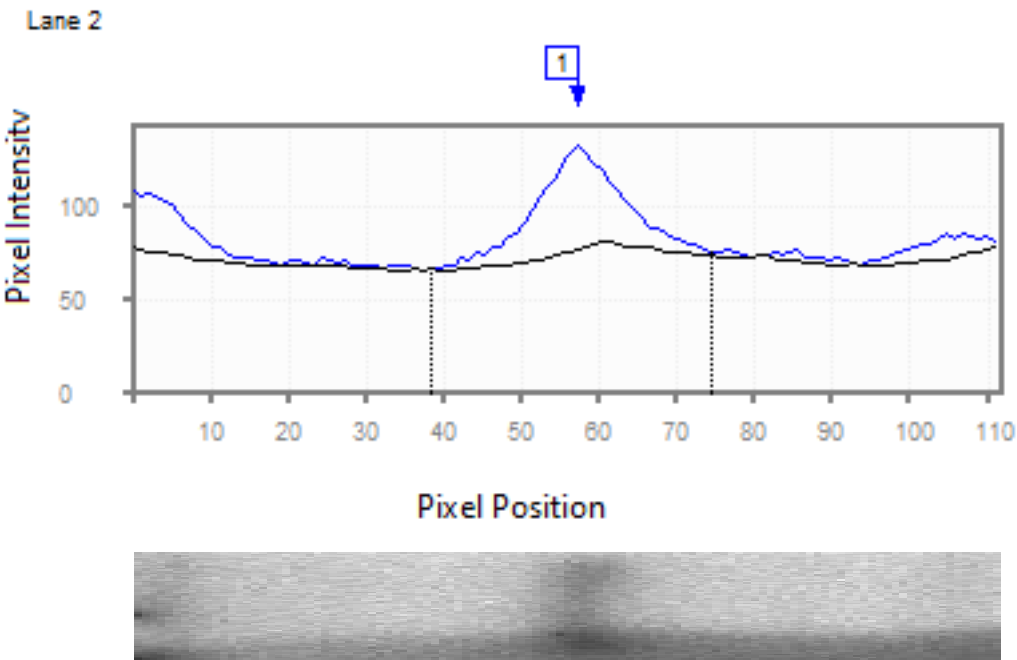

Method: Rolling Ball, Parameter: 20

| Band Nr. | Band N. | Band Vol.  | Backgr. Vol. | RF    | MW |
|----------|---------|------------|--------------|-------|----|
| Band 1   | 1       | 48,513.000 | 176,823.000  | 0.514 | -- |

| Band Nr. | Cal. Band Vol. |
|----------|----------------|
| Band 1   | 0.000          |

Lane 3: Lane 3

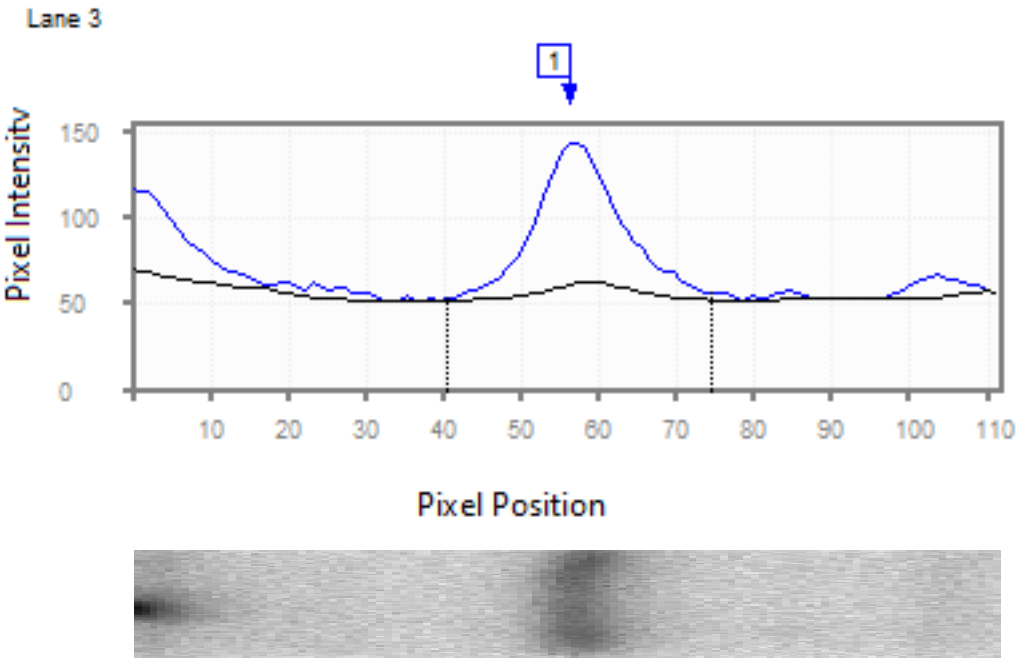

Method: Rolling Ball, Parameter: 20

| Band Nr. | Band N. | Band Vol.  | Backgr. Vol. | RF    | MW |
|----------|---------|------------|--------------|-------|----|
| Band 1   | 1       | 70,117.000 | 128,009.000  | 0.505 | -- |

| Band Nr. | Cal. Band Vol. |
|----------|----------------|
| Band 1   | 0.000          |

Lane 4: Lane 4

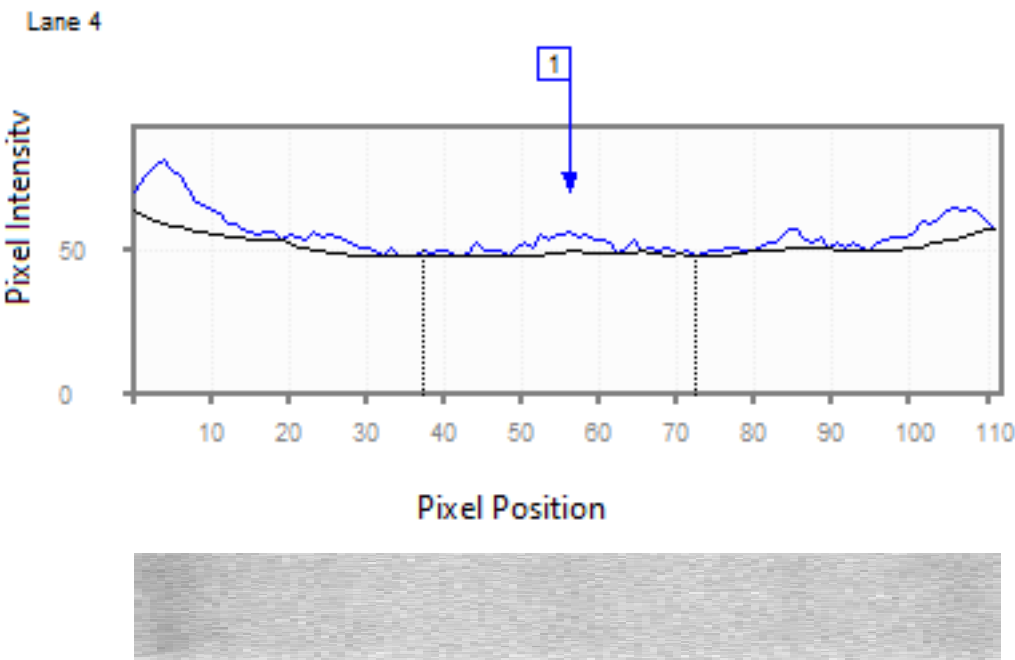

Method: Rolling Ball, Parameter: 20

| Band Nr. | Band N. | Band Vol. | Backgr. Vol. | RF    | MW |
|----------|---------|-----------|--------------|-------|----|
| Band 1   | 1       | 6,333.000 | 112,977.000  | 0.505 | -- |

| Band Nr. | Cal. Band Vol. |
|----------|----------------|
| Band 1   | 0.000          |

Lane 5: Lane 5

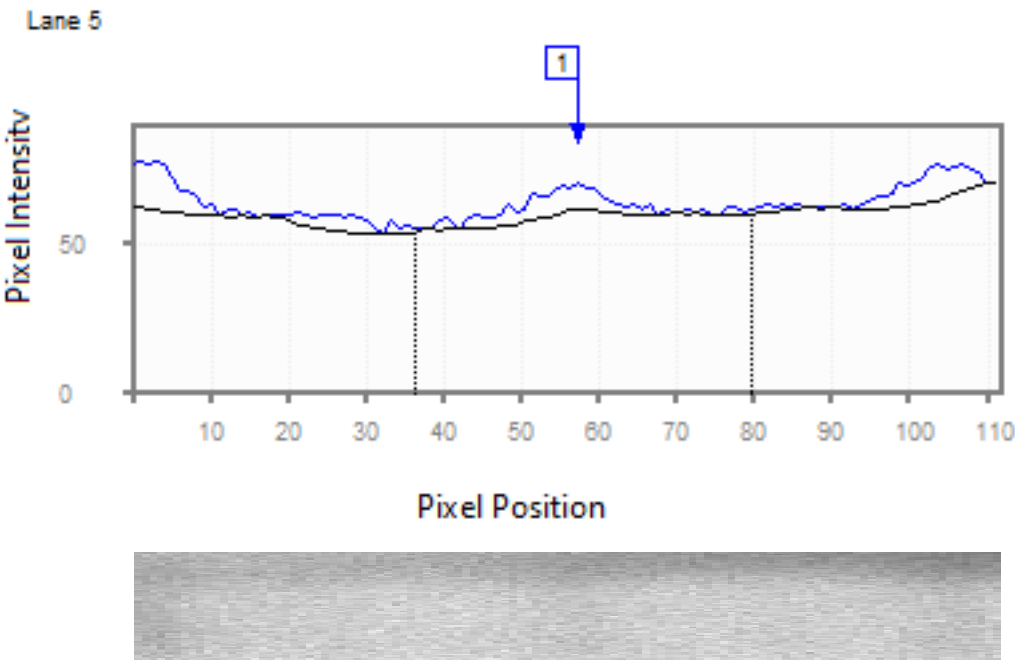

Method: Rolling Ball, Parameter: 20

| Band Nr. | Band N. | Band Vol.  | Backgr. Vol. | RF    | MW |
|----------|---------|------------|--------------|-------|----|
| Band 1   | 1       | 10,172.000 | 169,193.000  | 0.514 | -- |

| Band Nr. | Cal. Band Vol. |
|----------|----------------|
| Band 1   | 0.000          |

Lane 6: Lane 6

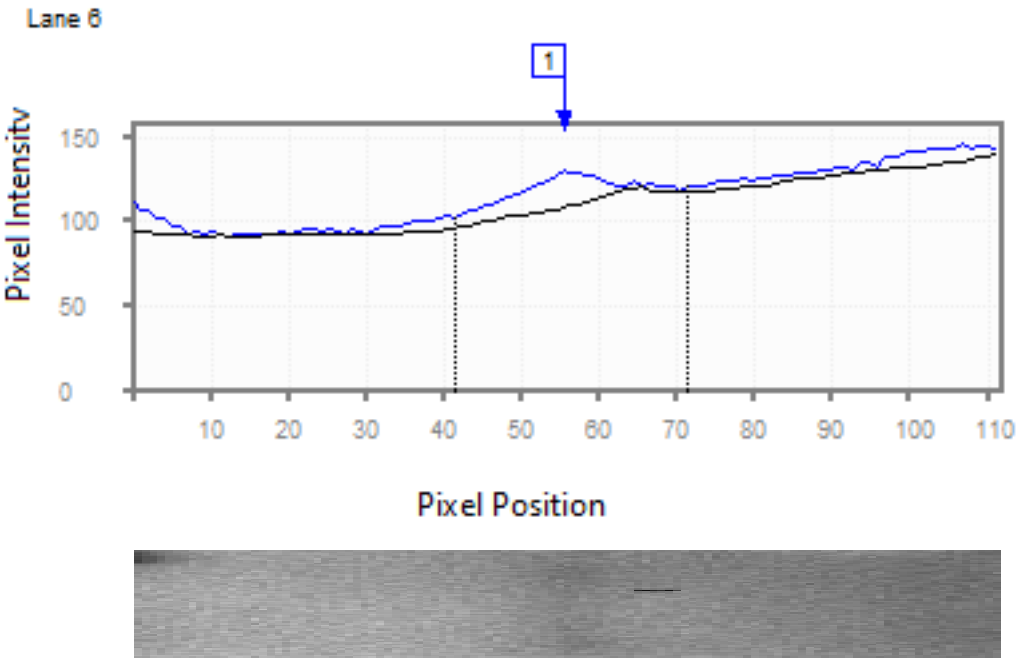

| Band Nr. | Band N. | Band Vol.  | Backgr. Vol. | RF    | MW |
|----------|---------|------------|--------------|-------|----|
| Band 1   | 1       | 19,343.000 | 219,052.000  | 0.495 | -- |

| Band Nr. | Cal. Band Vol. |
|----------|----------------|
| Band 1   | 0.000          |
